# Supplementary material for: Electronically modified amine substituted alkynols for regio-selective synthesis of dihydrofuran derivatives
Source: Royal Society of Chemistry journal article supplement (doi:10.1039/c5ob02033f), 2015-11-13
Supplement: c5ob02033f1.pdf [file c5ob02033f1.pdf]

# Electronically Modified Amine Substituted Alkynols for Regio-selective Synthesis of Dihydrofuran Derivatives

Vijay V,<sup>a</sup> Manjusha V. Karkhelikar,<sup>b</sup> B. Sridhar,<sup>c</sup> Nedaossadat Mirzadeh,<sup>d</sup> Pravin R.  
Likhar <sup>a,b,\*</sup>

[plikhar@iict.res.in](mailto:plikhar@iict.res.in)

## Contents

|                                                                                           |         |
|-------------------------------------------------------------------------------------------|---------|
| 1) General Techniques                                                                     | S2      |
| 2) <sup>1</sup> H NMR, <sup>13</sup> C NMR Spectral Data of <b>4a-4l</b>                  | S3-S14  |
| 3) <sup>1</sup> H NMR, <sup>13</sup> C NMR Spectral Data of <b>5a-5k</b>                  | S15-S23 |
| 4) <sup>1</sup> H NMR, <sup>13</sup> C NMR Spectral Data of <b>6d,7b,8a</b> and <b>9d</b> | S24-S27 |
| 5) X-ray Crystallographic Study of <b>5e</b> and <b>8a</b>                                | S28-S30 |

## General Techniques:

NMR spectra were recorded in Fourier transform mode. The  $^1\text{H}$  NMR and  $^{13}\text{C}$  NMR spectra were recorded on a 300 MHz, 400 MHz, and 500 MHz spectrophotometer using  $\text{CDCl}_3$  and TMS as the internal standard. Multiplicities in the  $^1\text{H}$  NMR spectra are described as: s = singlet, d = doublet, t = triplet, q = quartet, qt = quintet, m = multiplet, bs = broad singlet; coupling constants are reported in Hz. Low (MS) and high (HRMS) resolution mass spectra were recorded by ion trap method and mass/charge ( $m/z$ ) ratios are reported as values in atomic mass units. All the melting point is uncorrected.

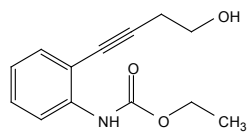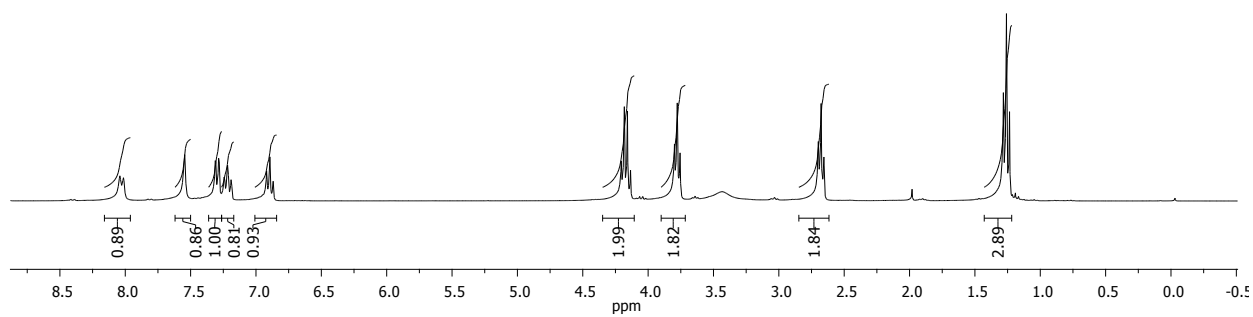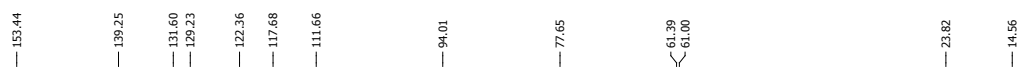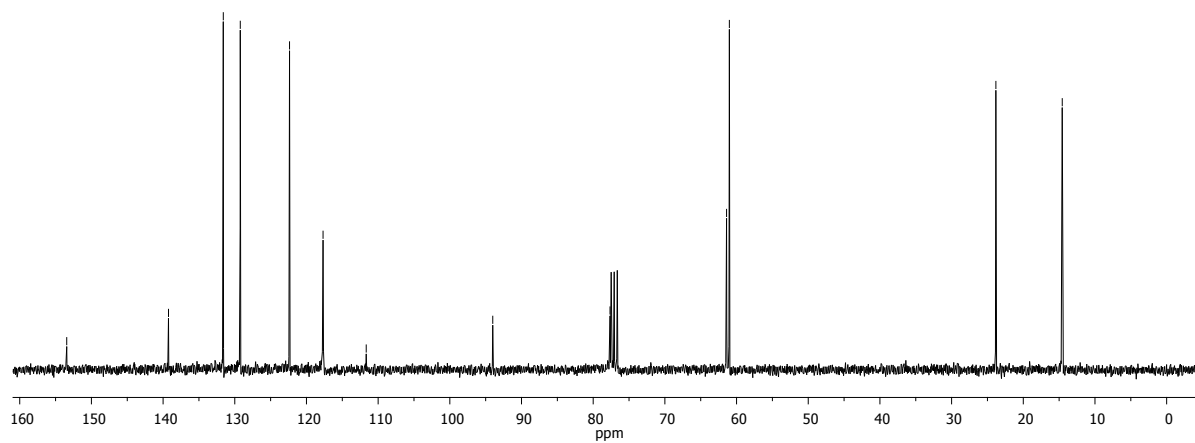

$^1\text{H}$  NMR and  $^{13}\text{C}$  NMR of 4a

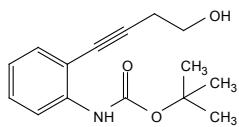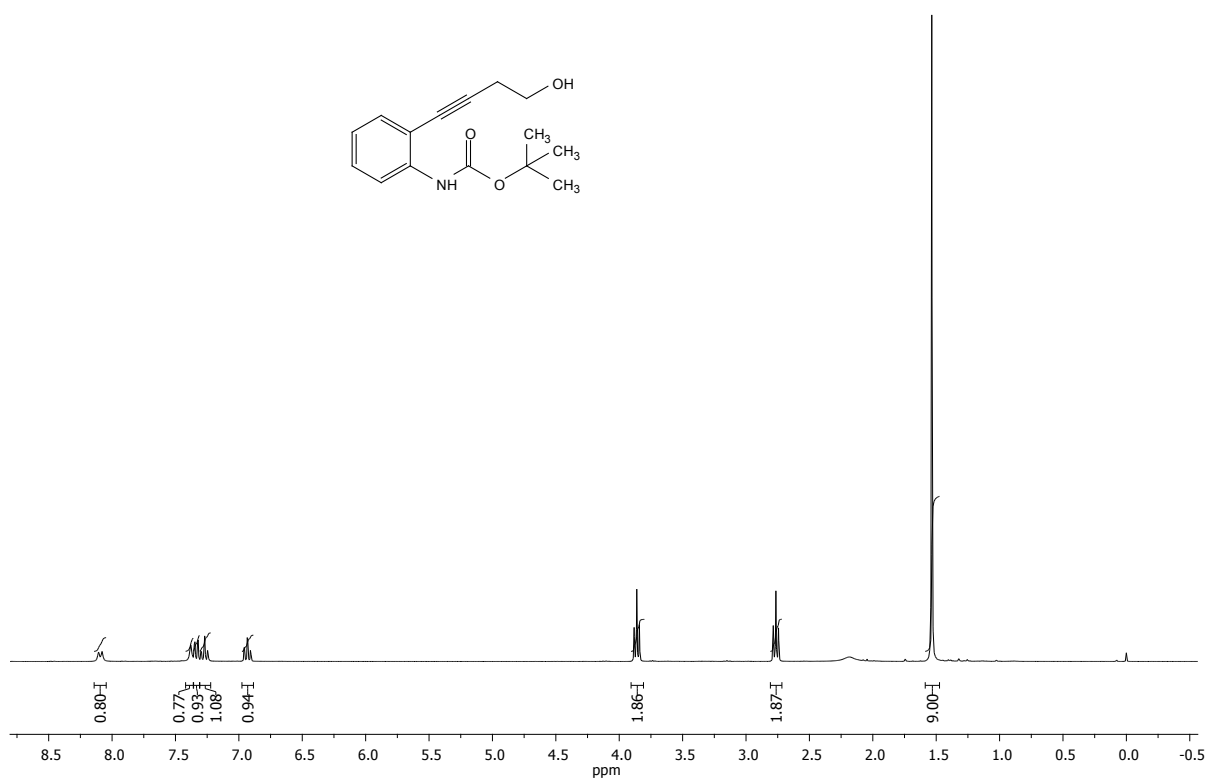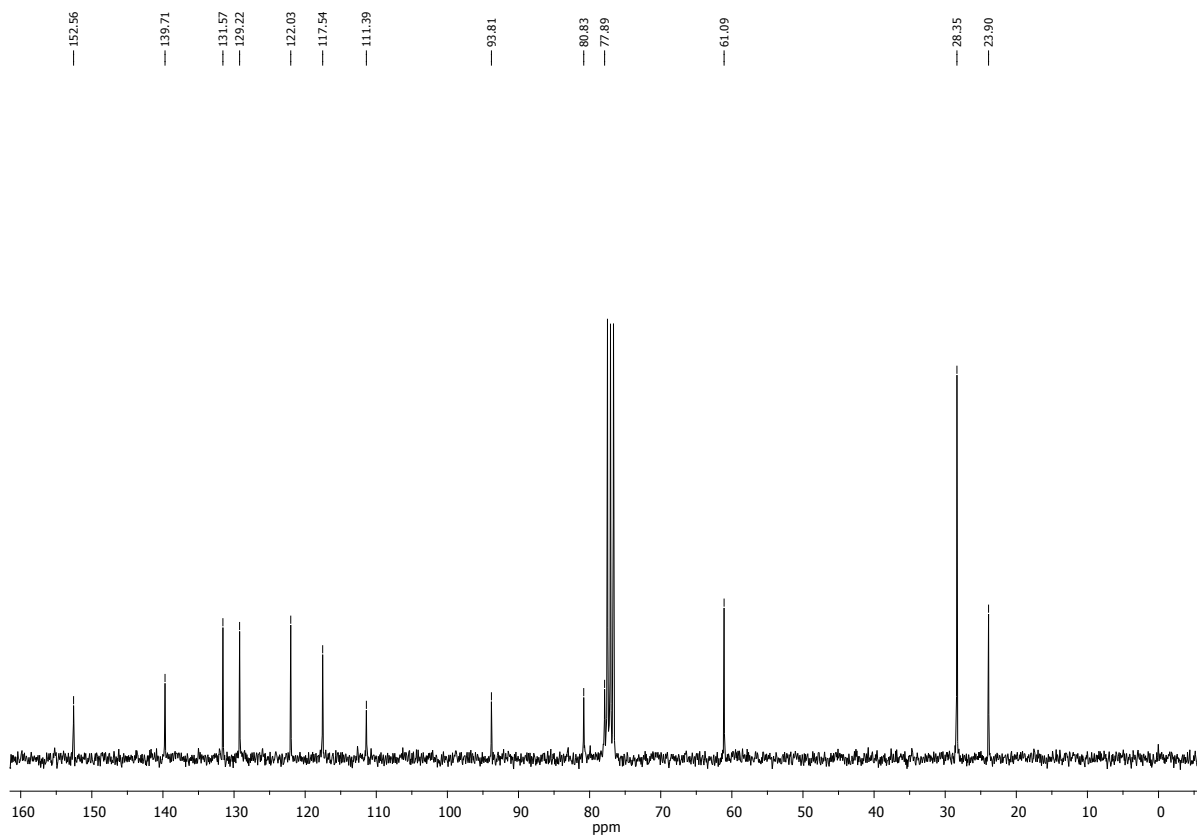

$^1\text{H}$  NMR and  $^{13}\text{C}$  NMR of 4b

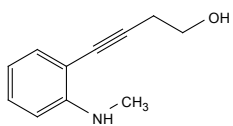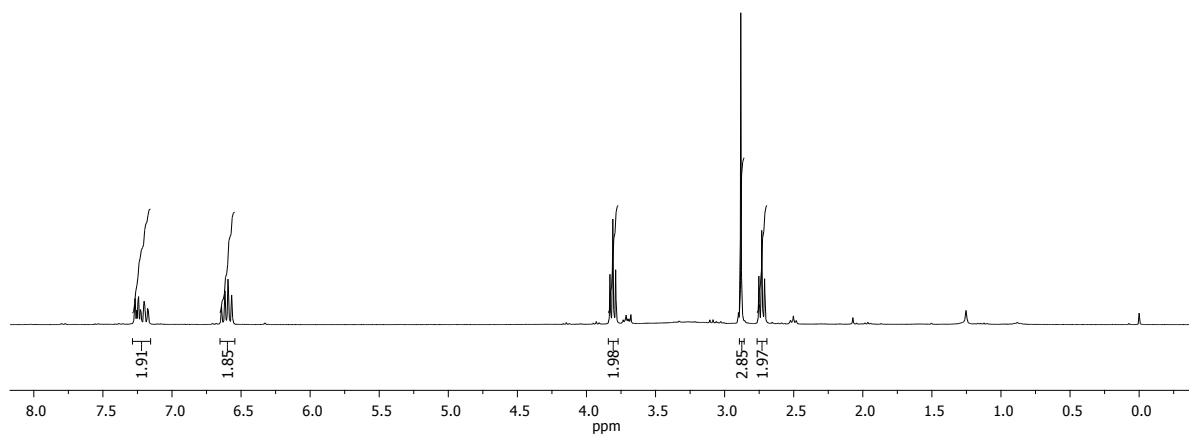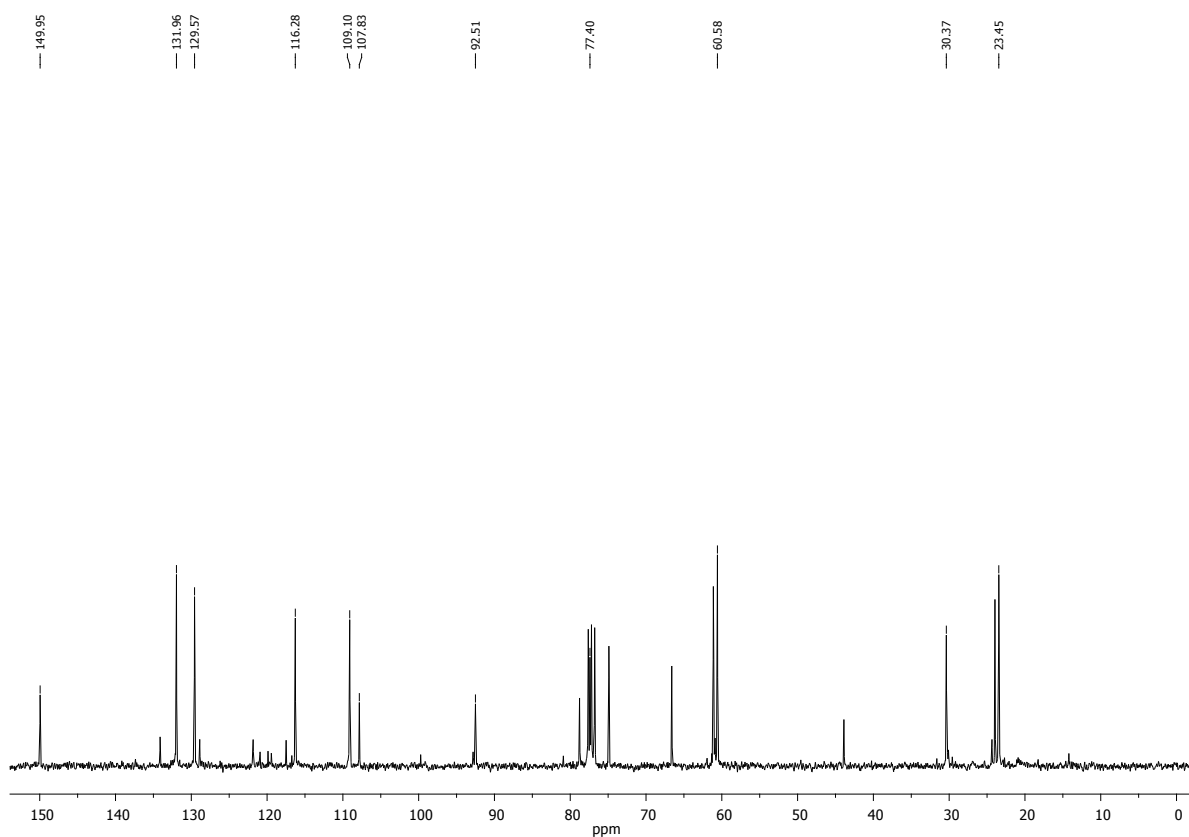

$^1\text{H}$  NMR and  $^{13}\text{C}$  NMR of 4c

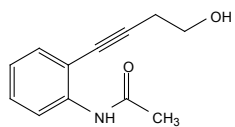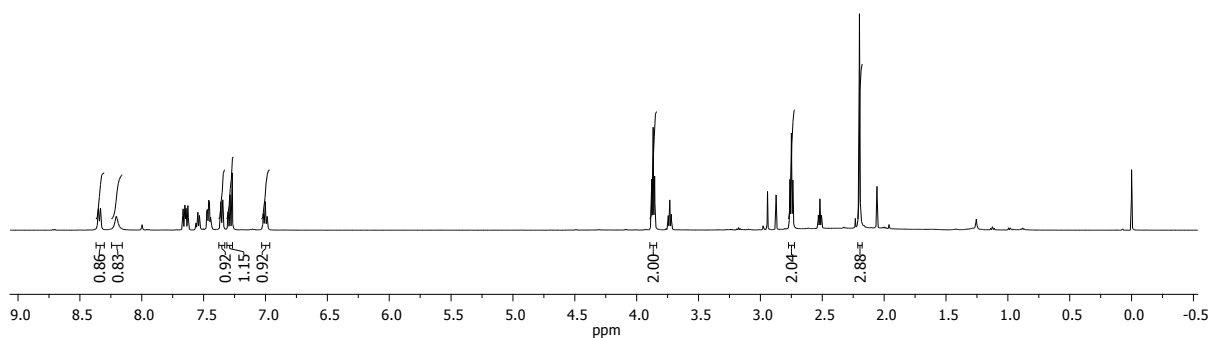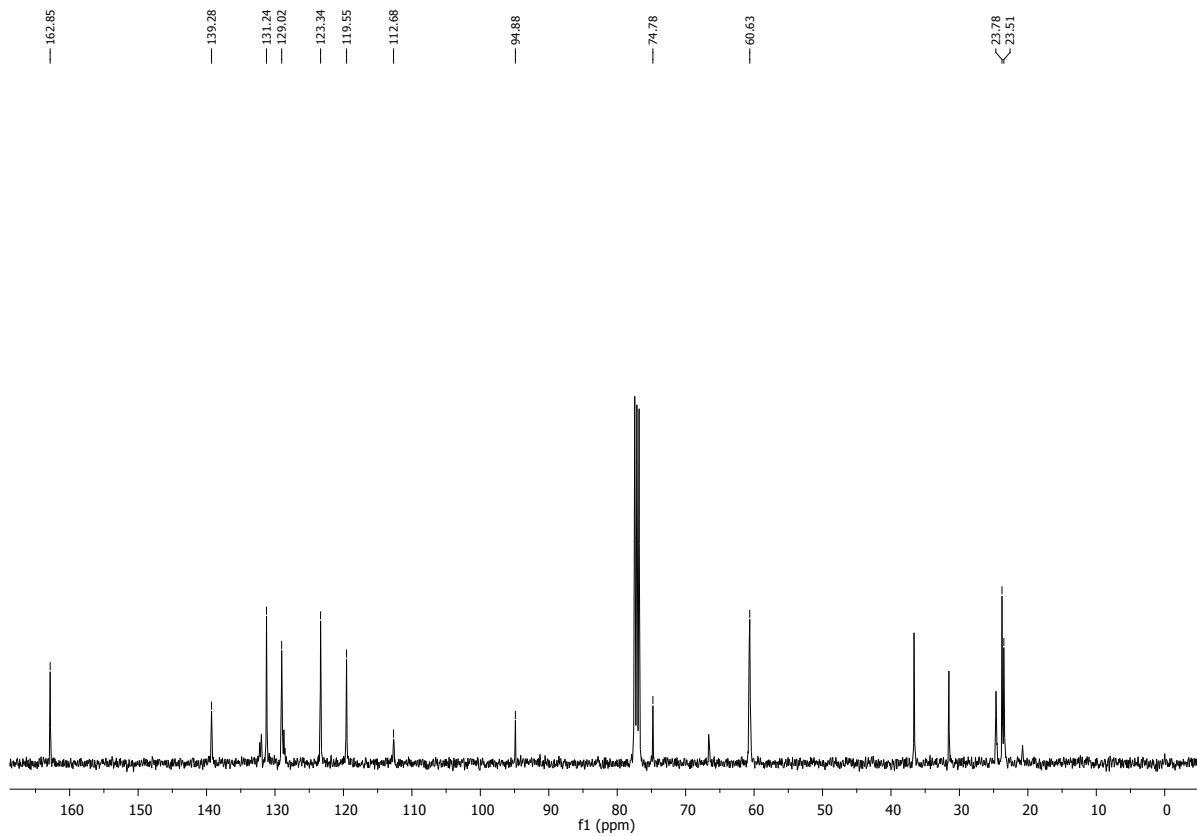

<sup>1</sup>H NMR and <sup>13</sup>C NMR of 4d

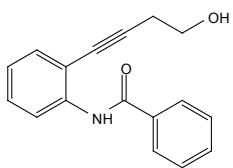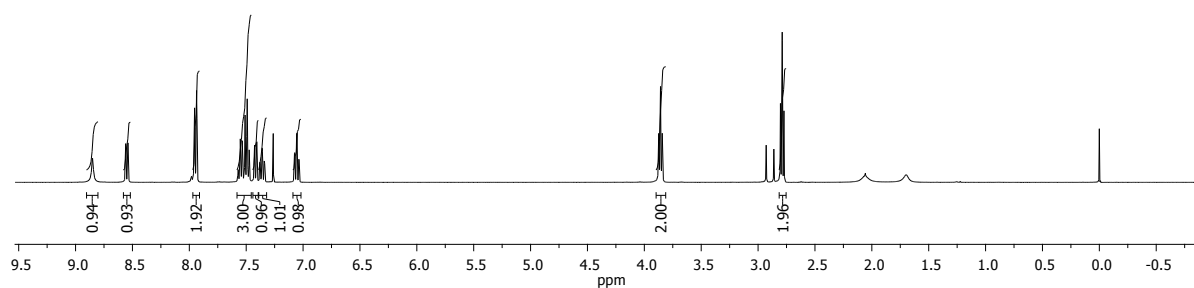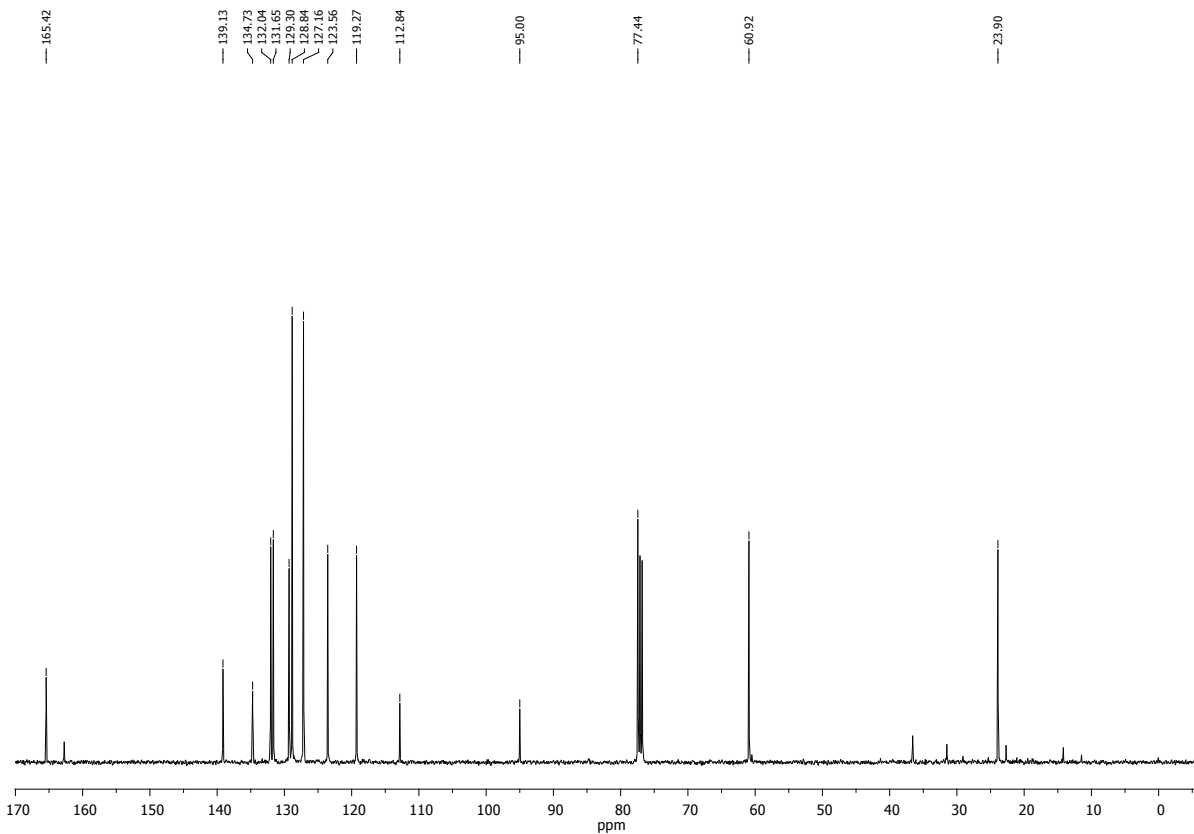

$^1\text{H}$  NMR and  $^{13}\text{C}$  NMR of 4e

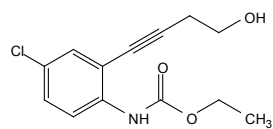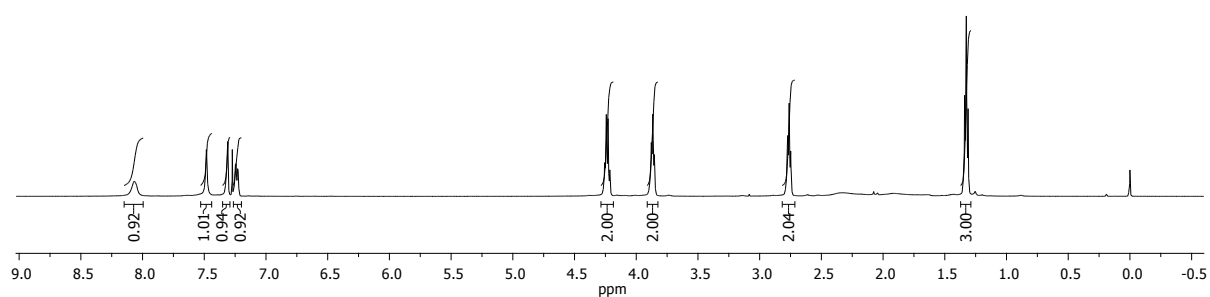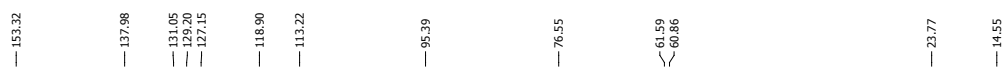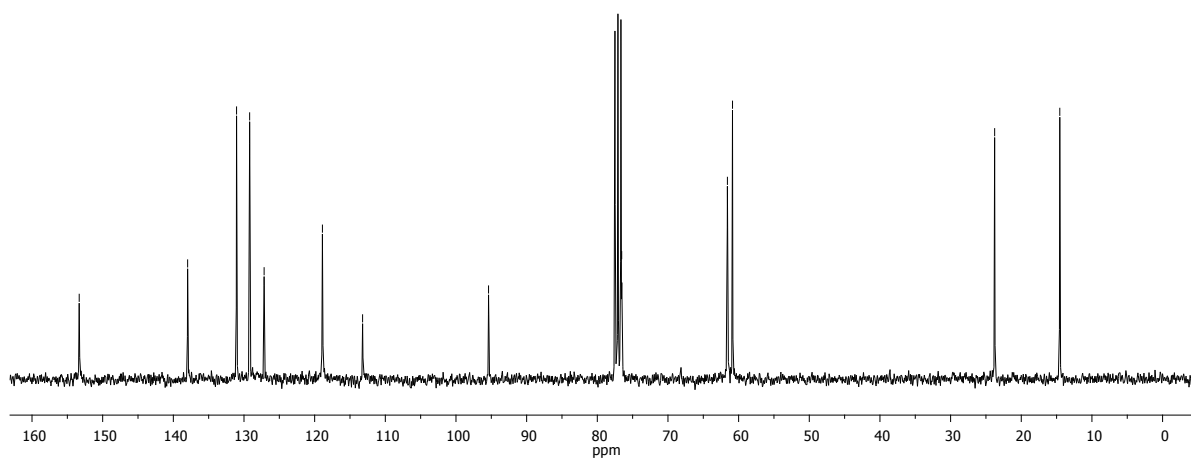

$^1\text{H}$  NMR and  $^{13}\text{C}$  NMR of 4f



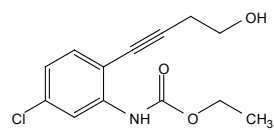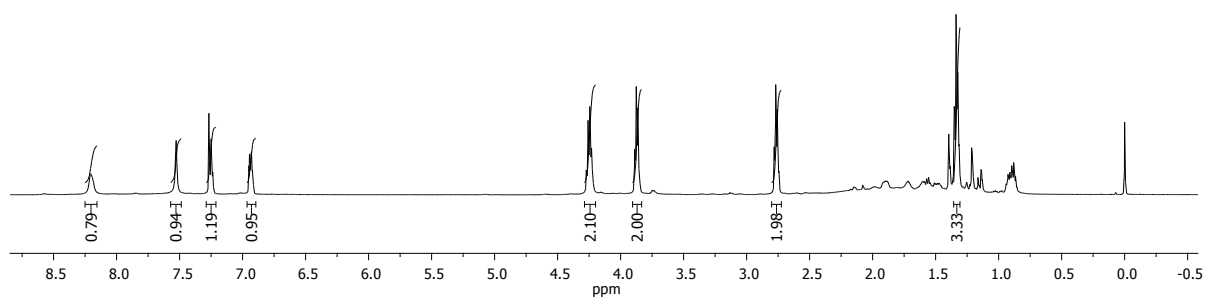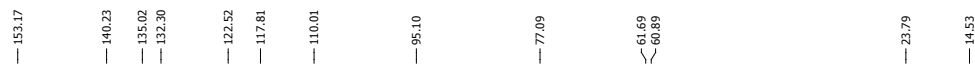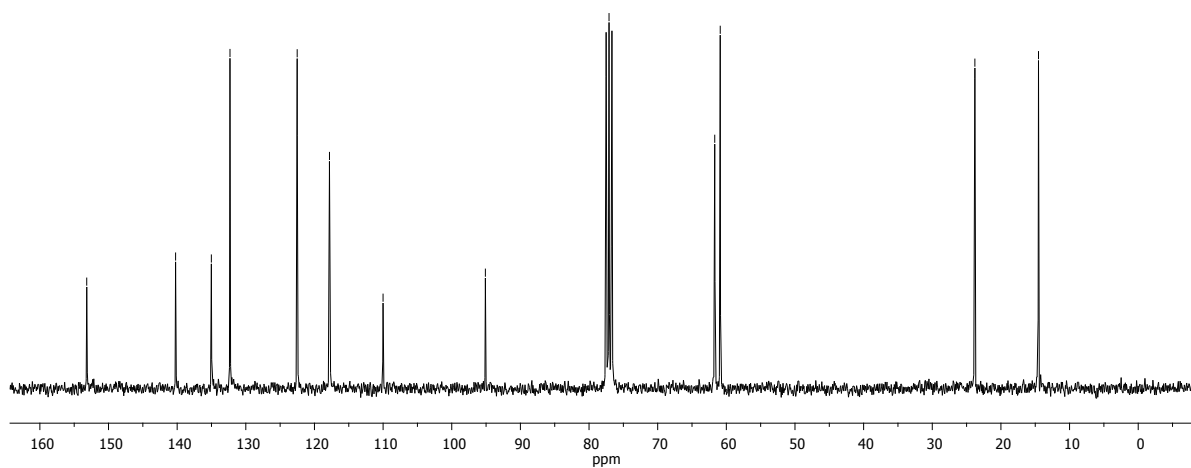

$^1\text{H}$  NMR and  $^{13}\text{C}$  NMR of 4g

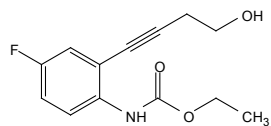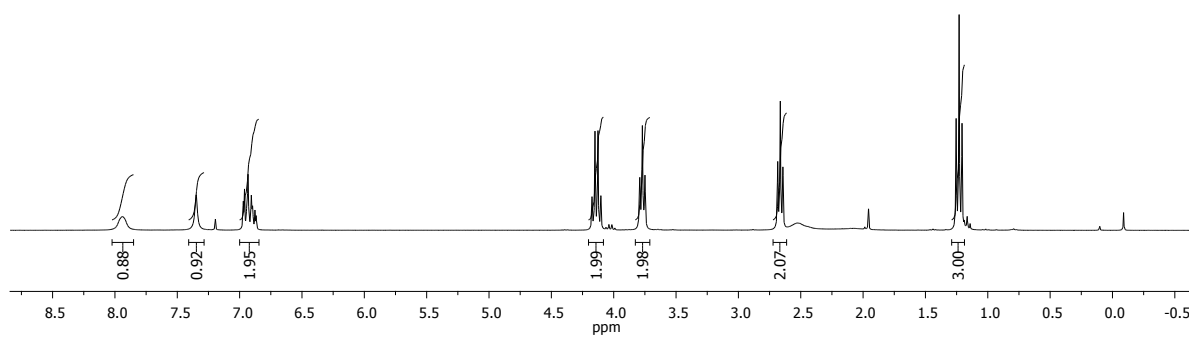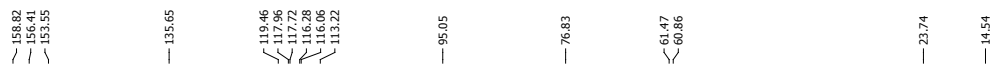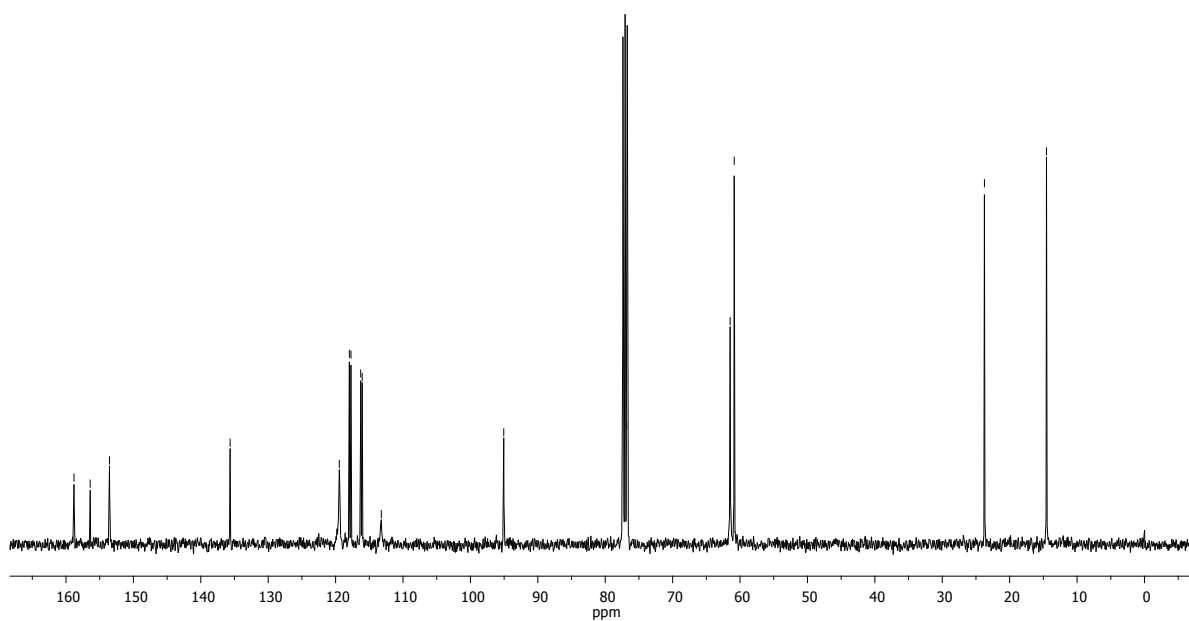

**<sup>1</sup>H NMR and <sup>13</sup>C NMR of 4h**

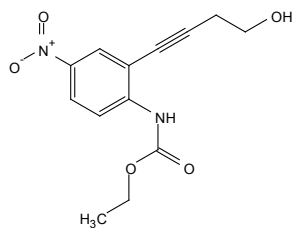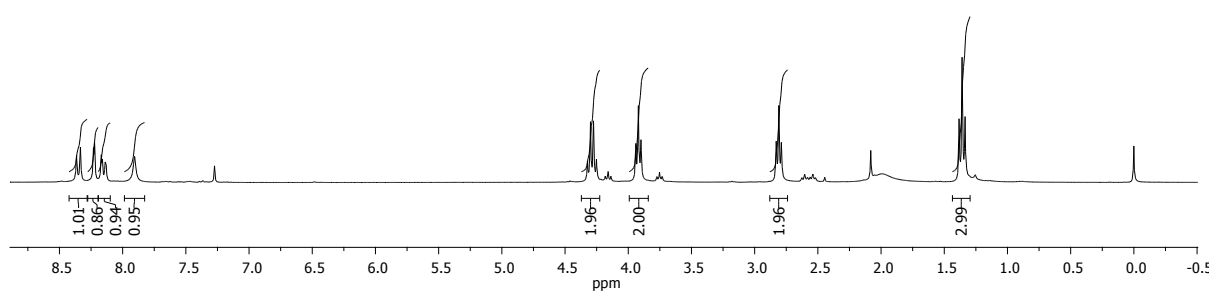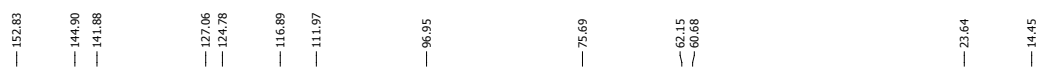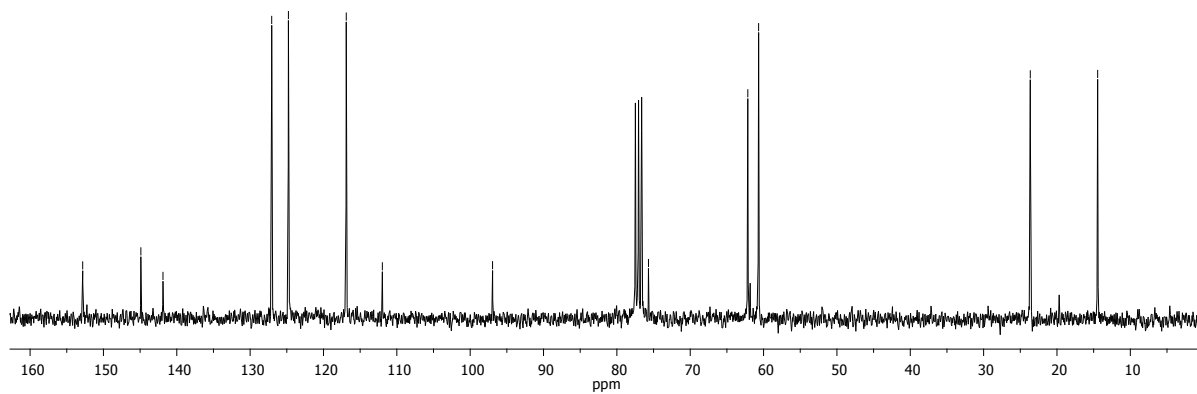

<sup>1</sup>H NMR and <sup>13</sup>C NMR of 4i

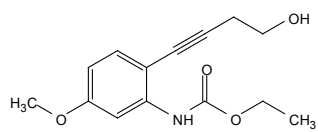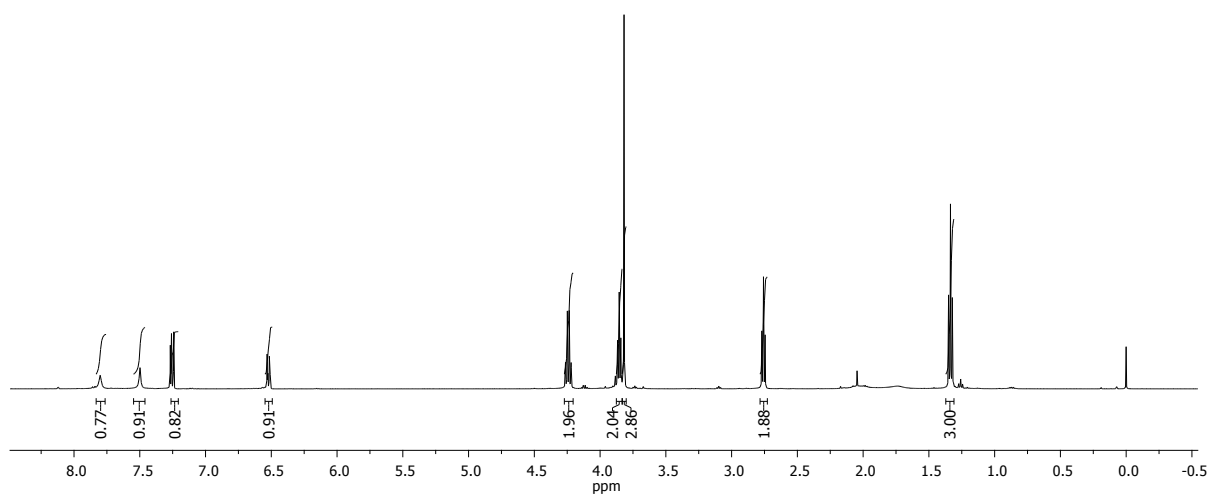

160.37, 153.37, 140.68, 132.48, 109.15, 103.73, 102.78, 92.47, 77.62, 61.41, 61.15, 55.38, 23.90, 14.58

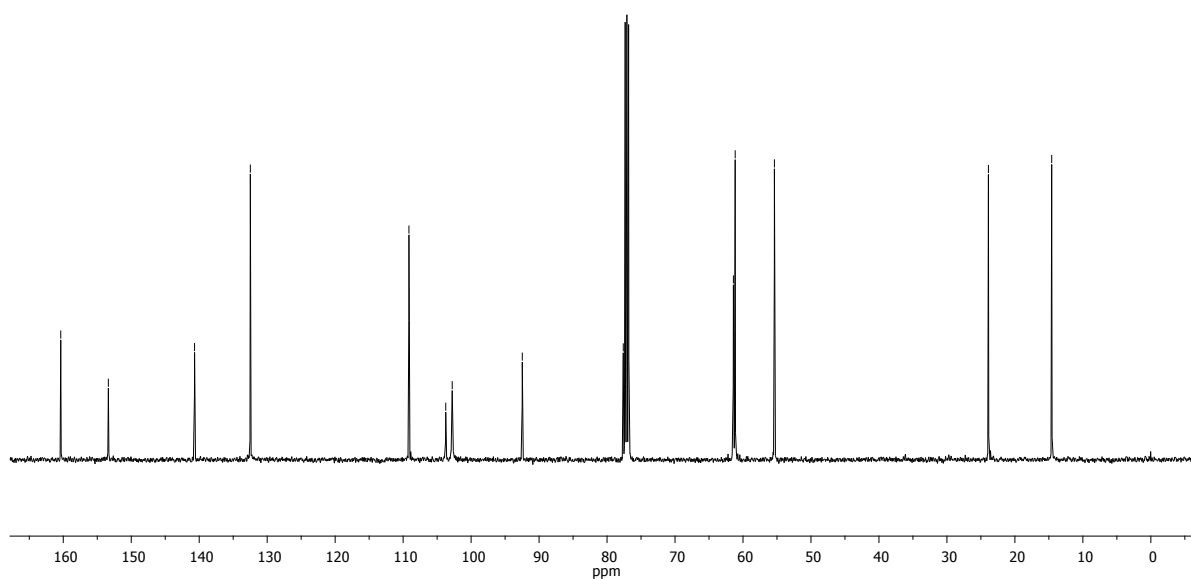

<sup>1</sup>H NMR and <sup>13</sup>C NMR of 4j

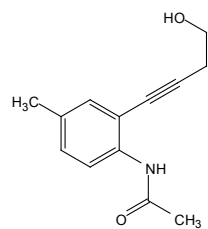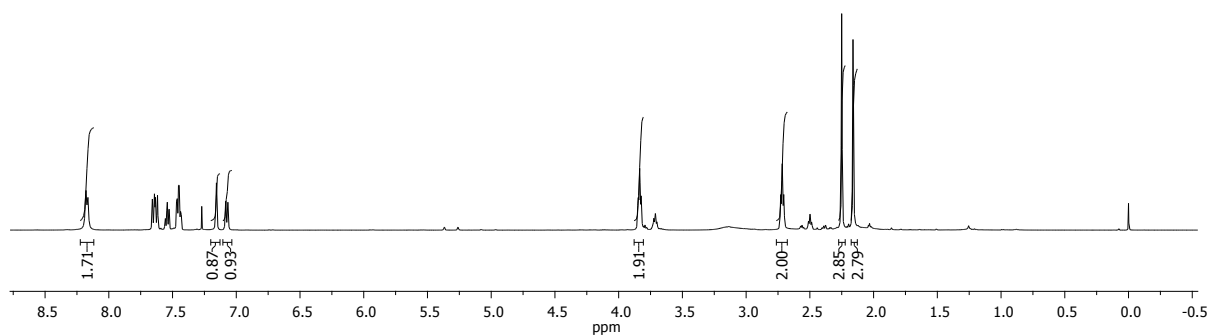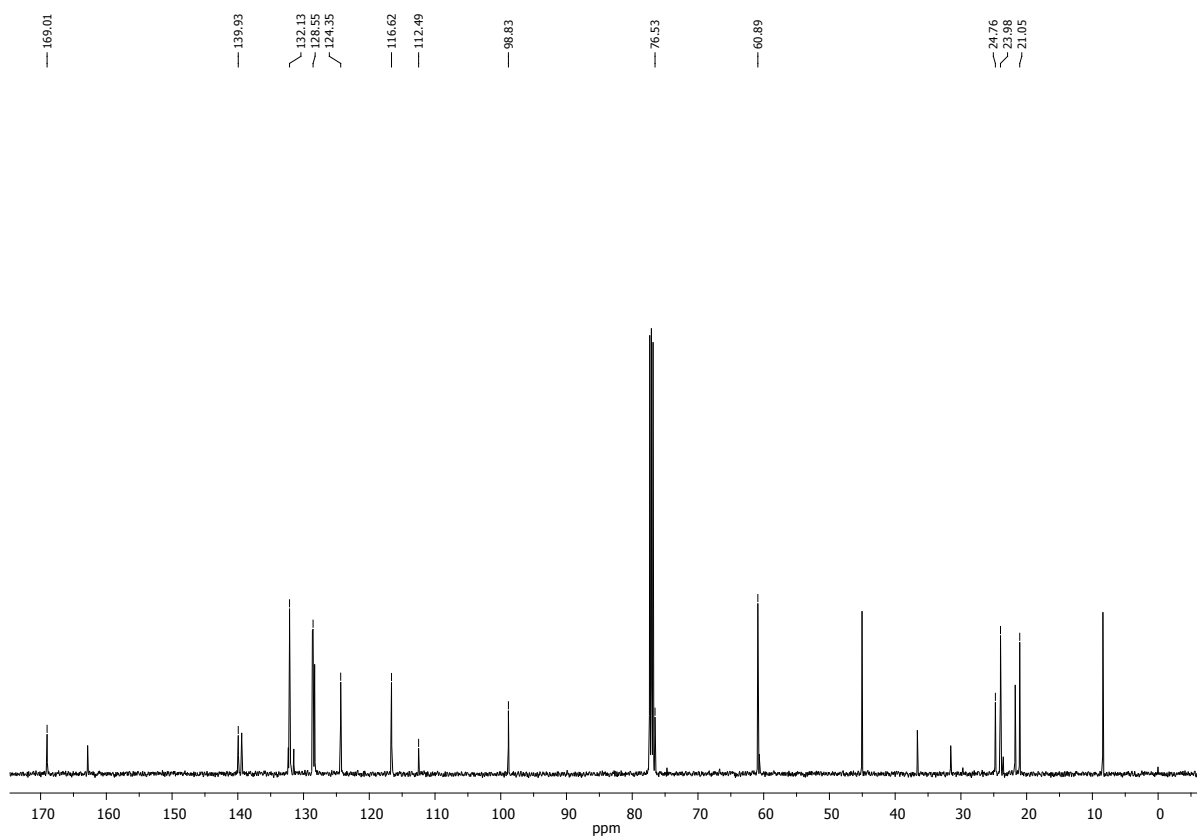

<sup>1</sup>H NMR and <sup>13</sup>C NMR of 4k

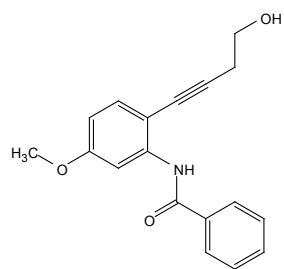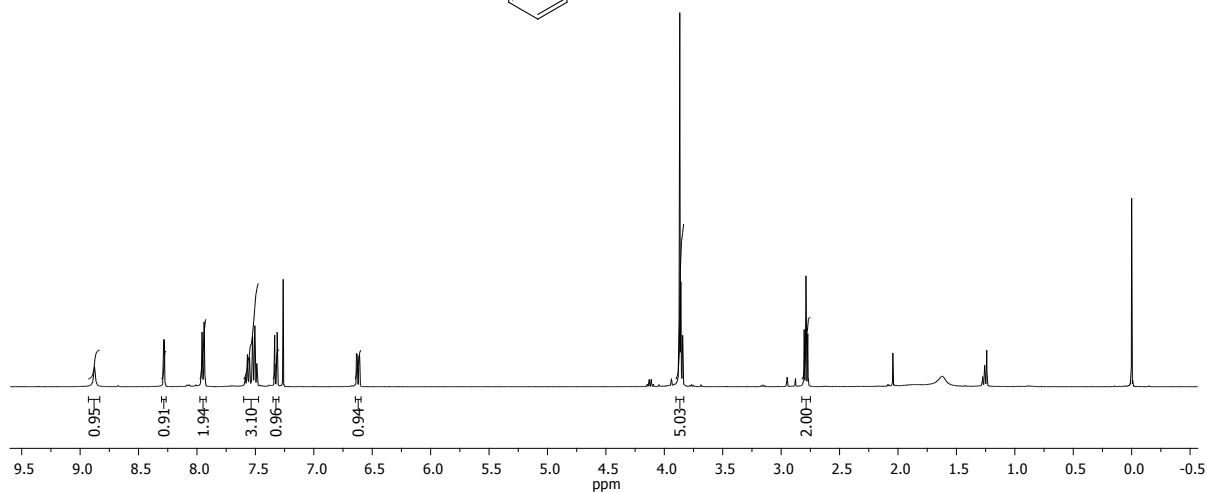

— 165.38  
 — 160.31  
 — 140.52  
 — 134.69  
 — 132.38  
 — 132.08  
 — 128.86  
 — 127.10  
 — 110.38  
 — 104.73  
 — 104.23  
 — 93.37  
 — 77.29  
 — 61.08  
 — 55.48  
 — 23.93

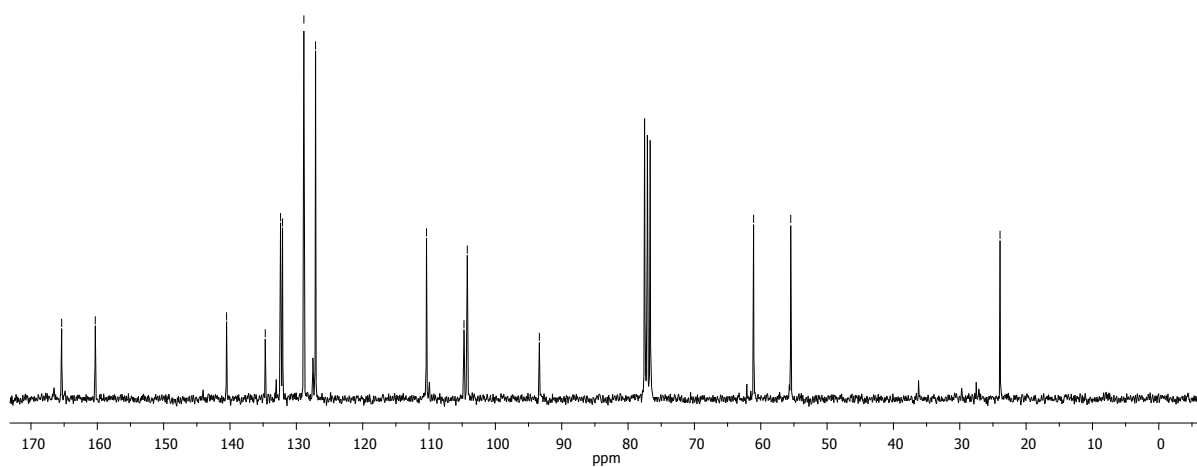

**$^1\text{H}$  NMR and  $^{13}\text{C}$  NMR of 4I**

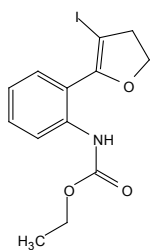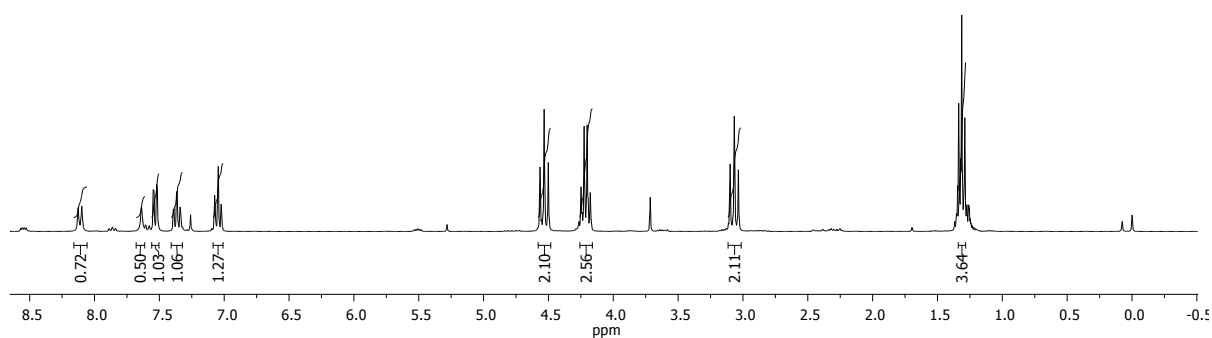

153.26  
152.46

135.73

129.83  
129.50

121.20  
118.29  
118.13

69.10

60.19  
58.37

40.12

13.60

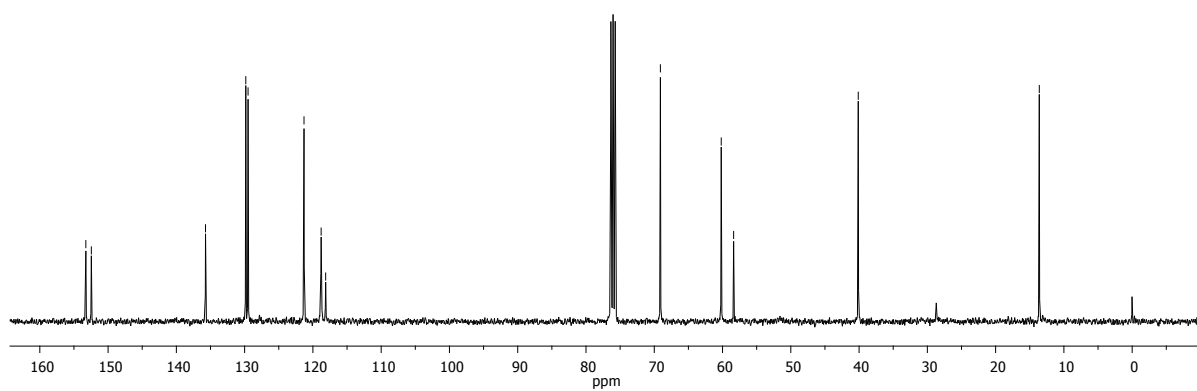

<sup>1</sup>H NMR and <sup>13</sup>C NMR of 5a

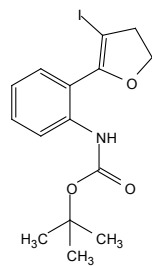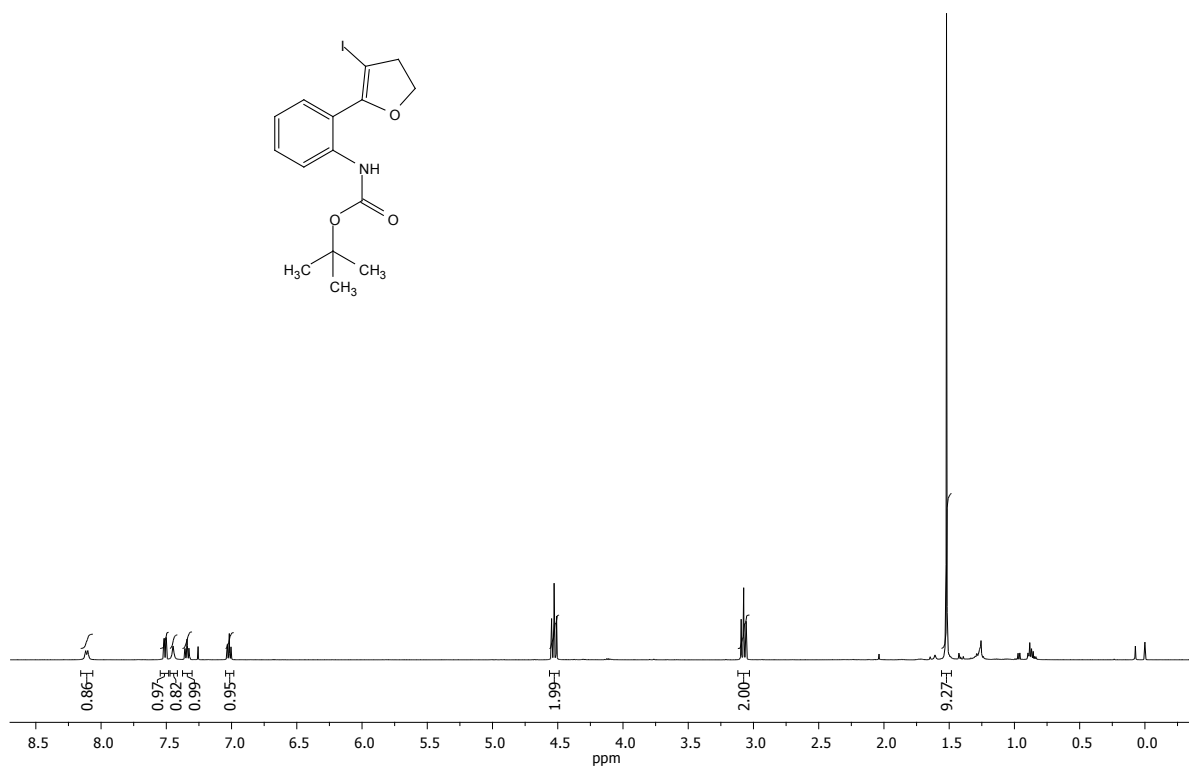

— 154.40  
 — 152.67  
 — 137.12  
 < 130.85  
 < 130.44  
 > 121.98  
 > 119.65  
 > 118.92  
 — 80.50  
 — 70.09  
 — 59.30  
 — 41.12  
 — 28.37

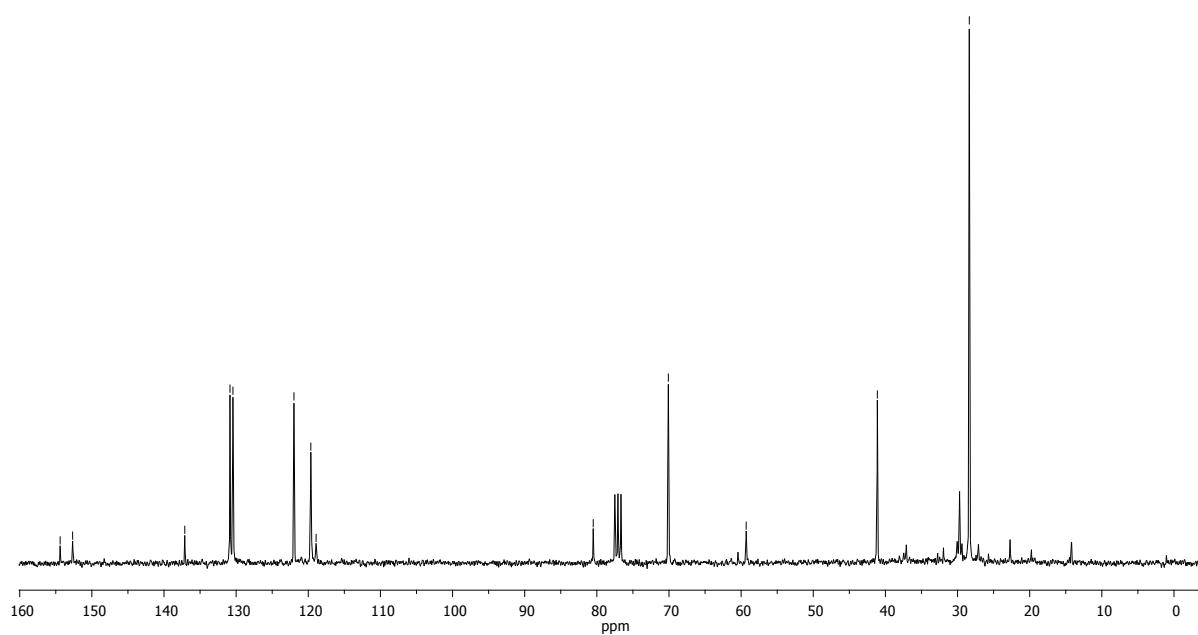

**<sup>1</sup>H NMR and <sup>13</sup>C NMR of 5b**



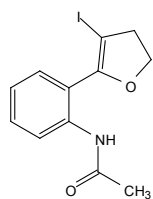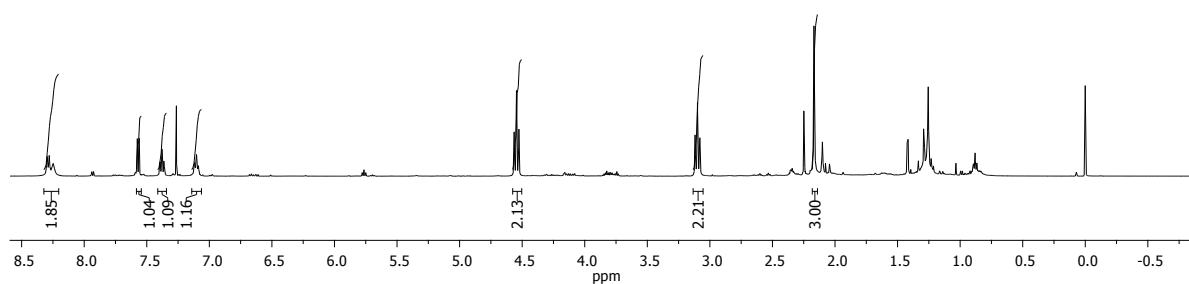

— 168.11 — 154.15 — 136.42 — 130.80 — 130.47 — 123.30 — 121.47 — 119.65 — 70.19 — 59.63 — 41.27 — 25.21

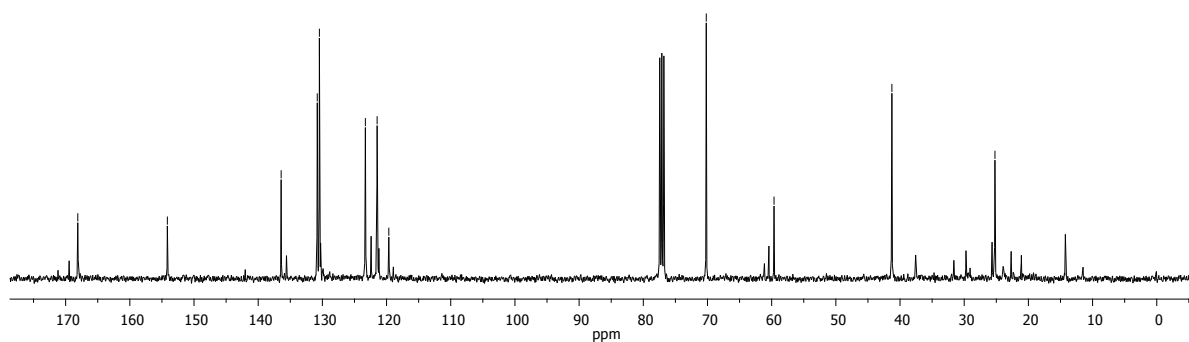

**<sup>1</sup>H NMR and <sup>13</sup>C NMR of 5d**

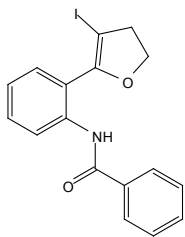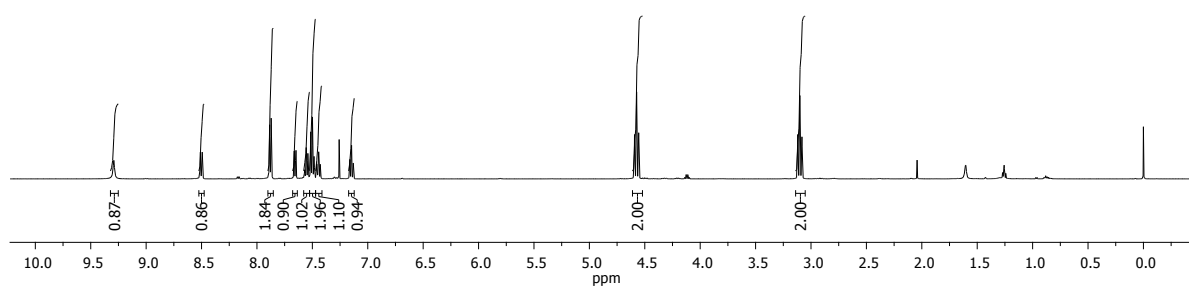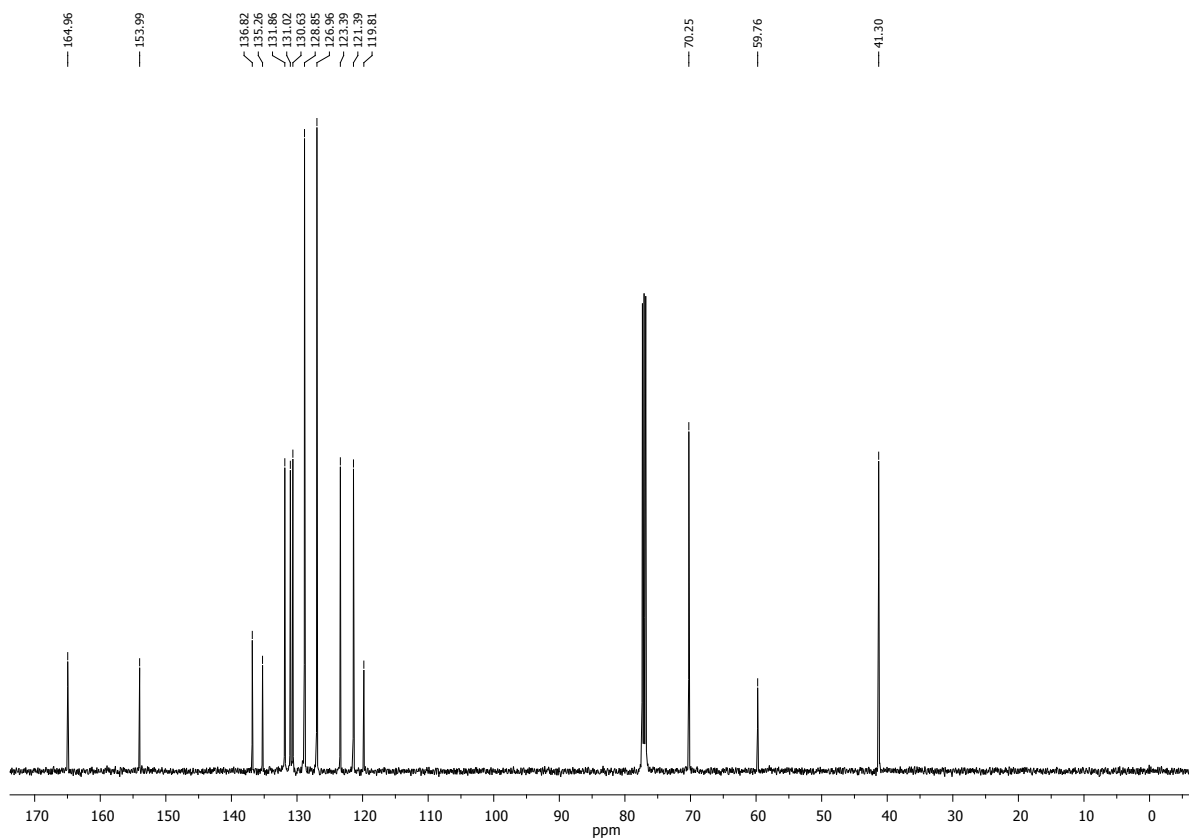

$^1\text{H}$  NMR and  $^{13}\text{C}$  NMR of 5e

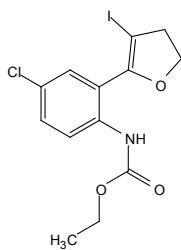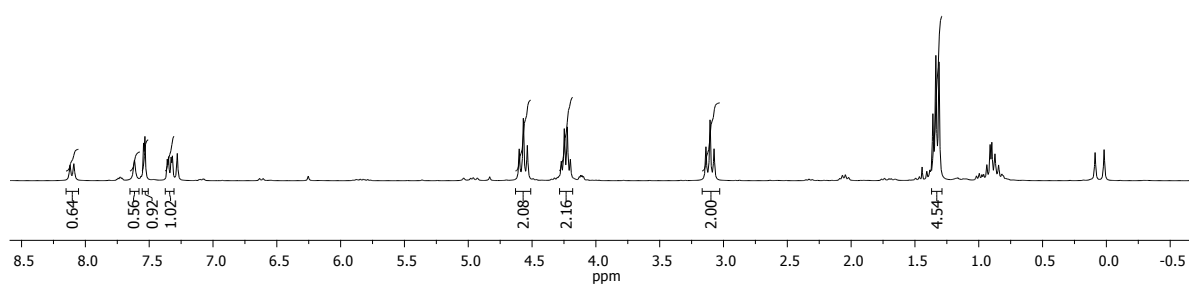

153.35  
152.96

135.41

130.45  
130.32

121.12

115.91  
114.11

70.29

61.44  
60.45

41.16

14.62

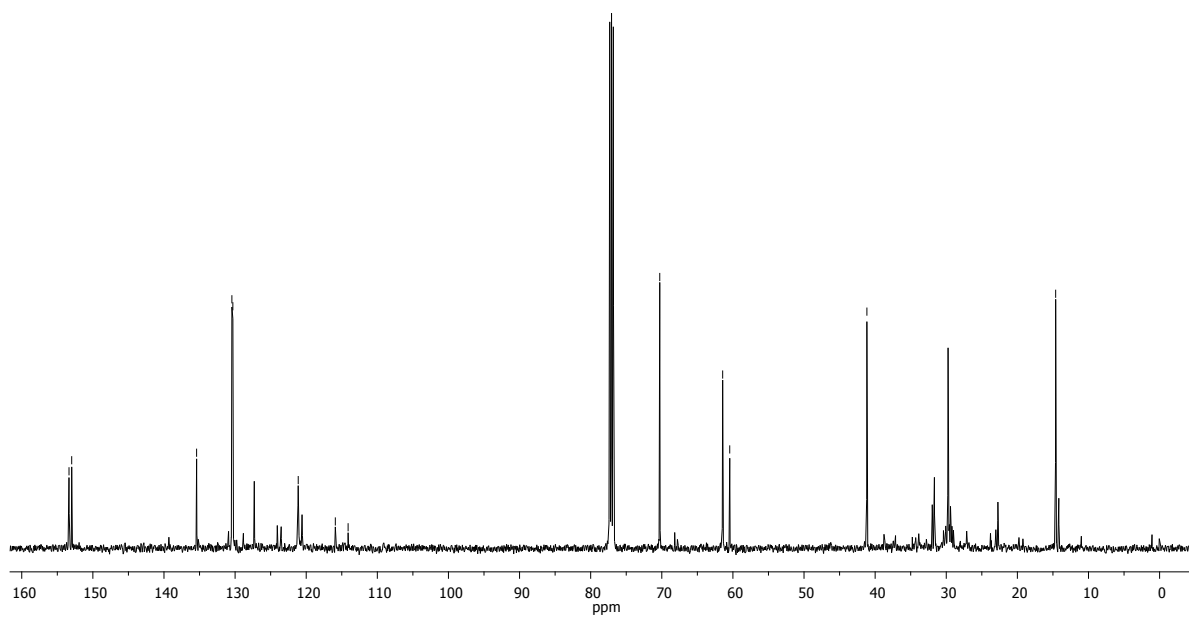

<sup>1</sup>H NMR and <sup>13</sup>C NMR of 5f

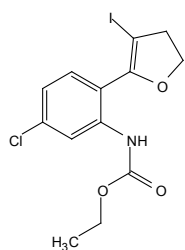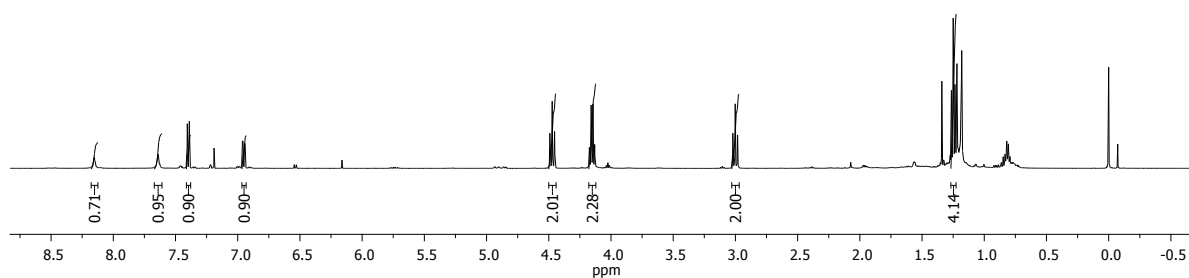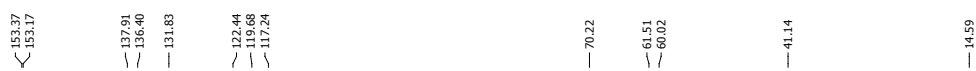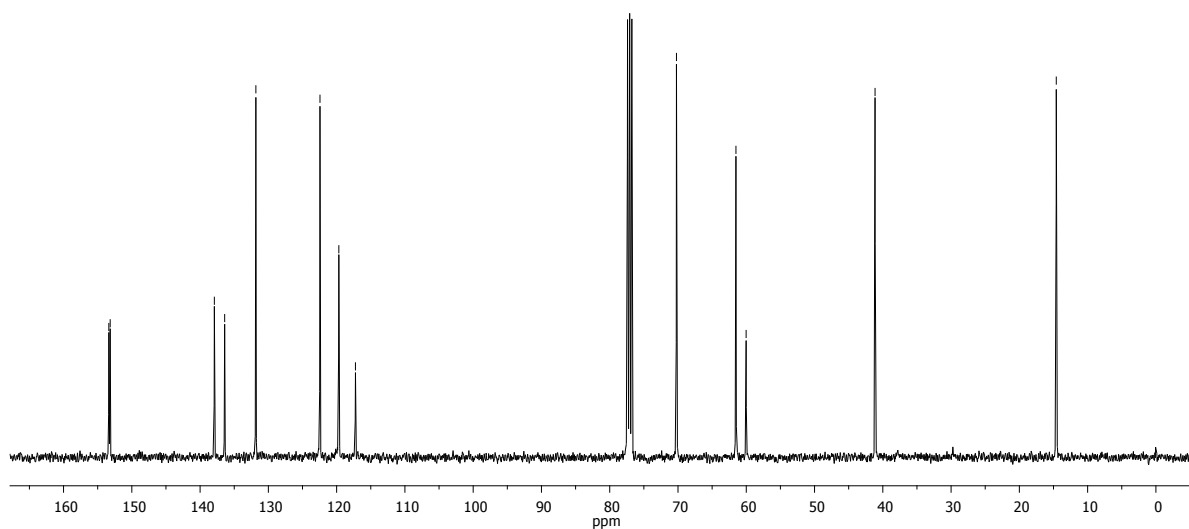

**<sup>1</sup>H NMR and <sup>13</sup>C NMR of 5g**

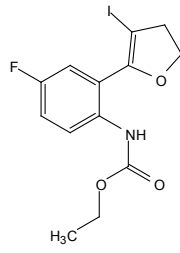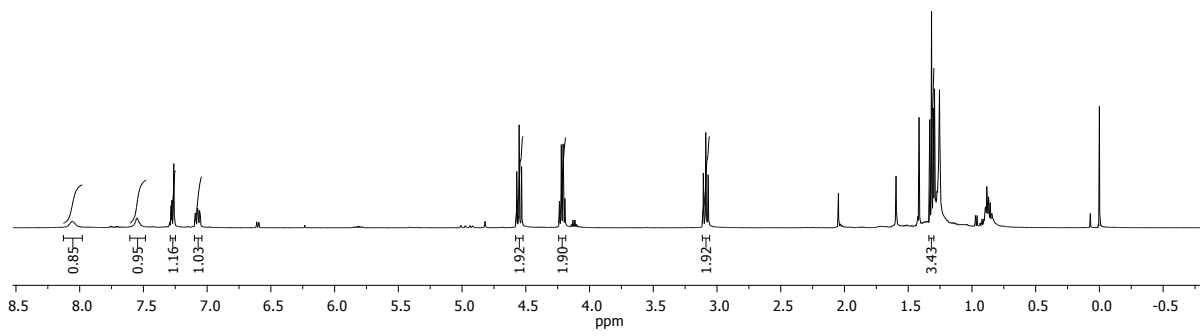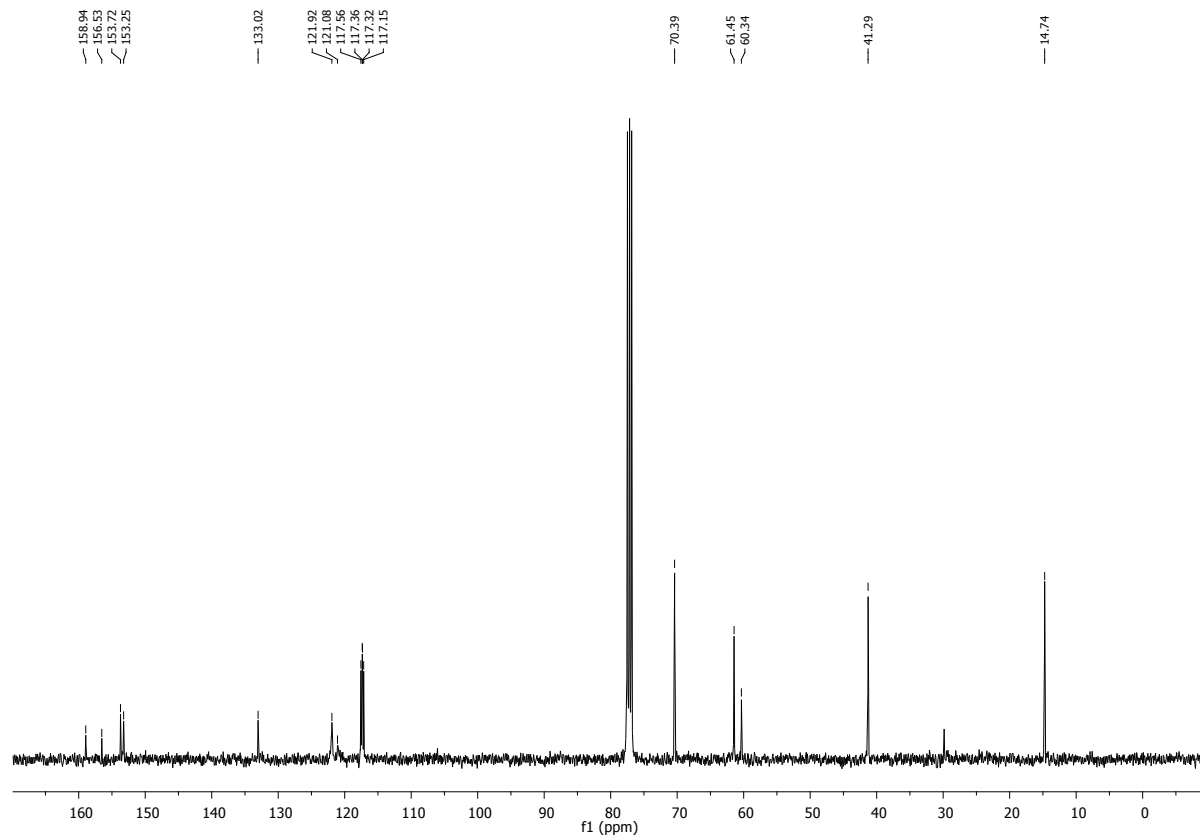

**<sup>1</sup>H NMR and <sup>13</sup>C NMR of 5h**

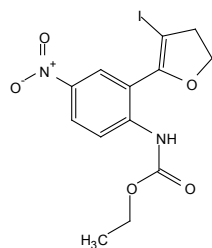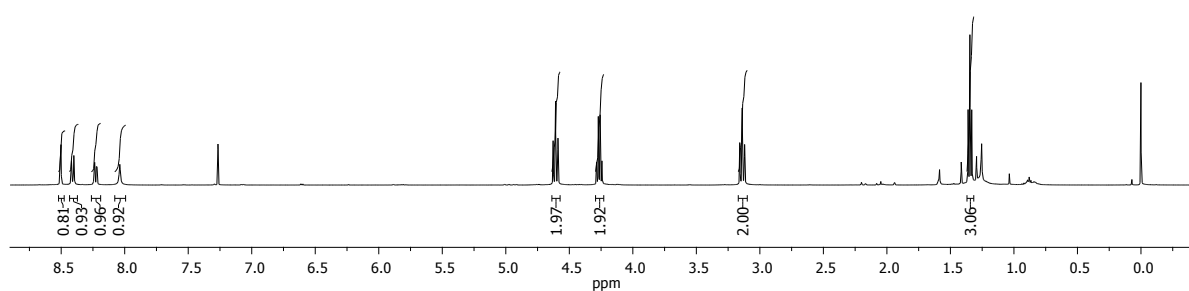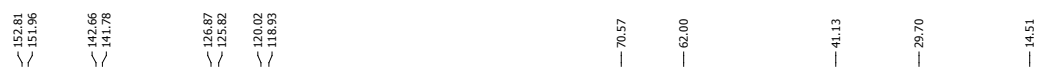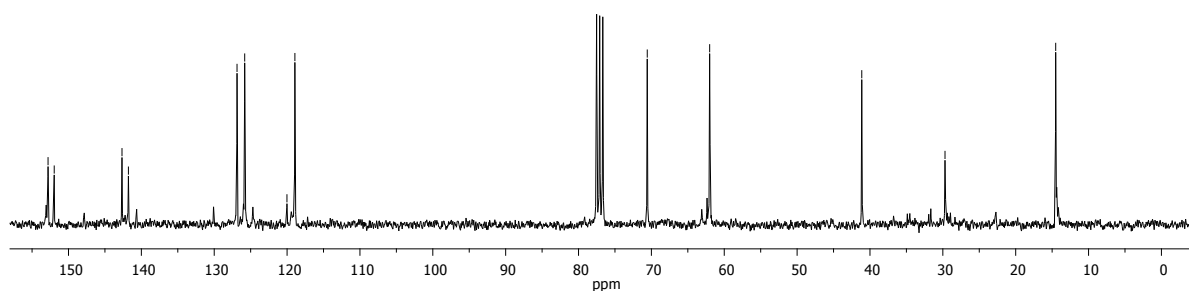

**<sup>1</sup>H NMR and <sup>13</sup>C NMR of 5i**

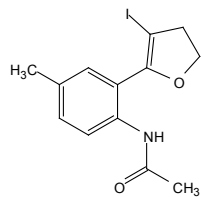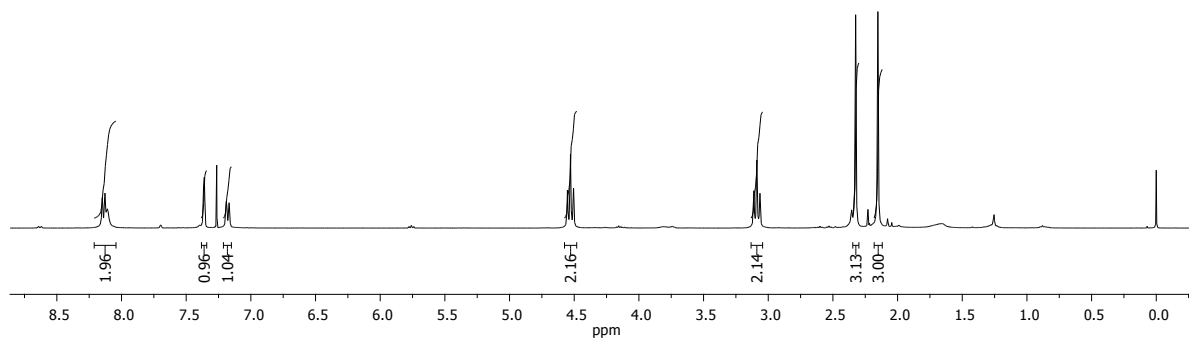

— 169.34  
 — 154.31  
 < 139.63  
 — 136.45  
 — 132.99  
 > 131.07  
 — 121.62  
 — 119.70  
 — 70.13  
 — 60.44  
 — 41.28  
 — 25.12  
 — 20.74

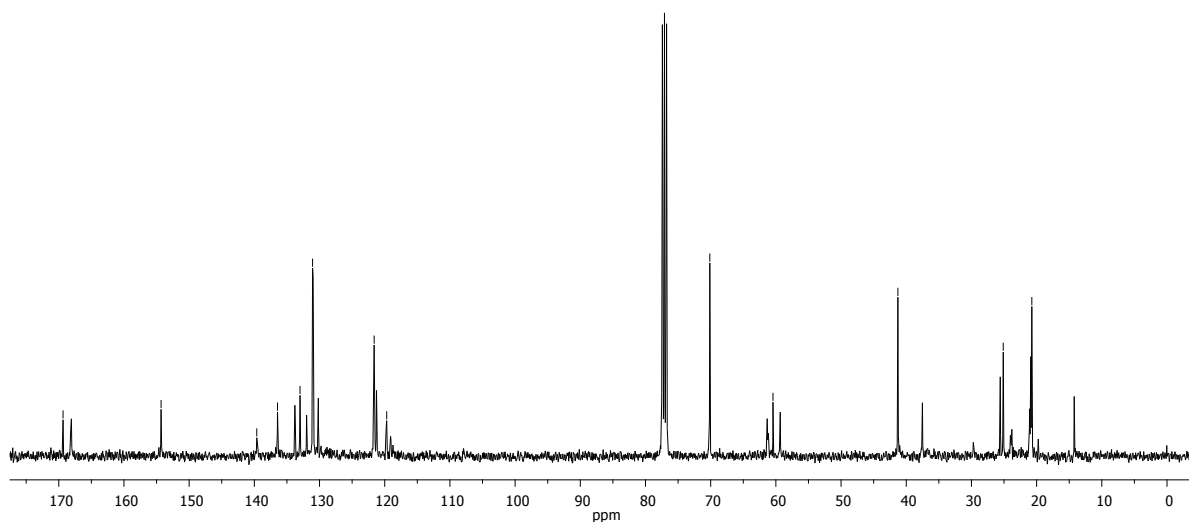

**<sup>1</sup>H NMR and <sup>13</sup>C NMR of 5k**

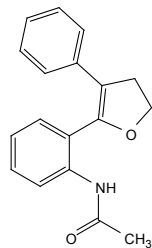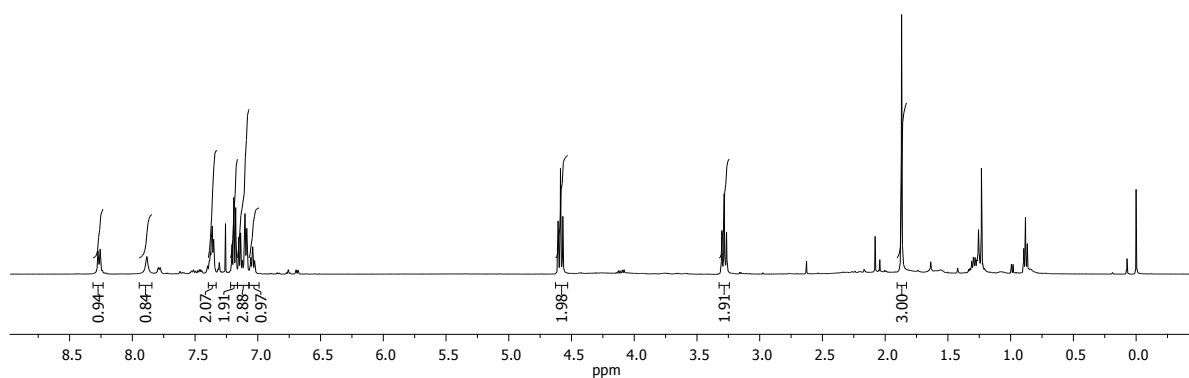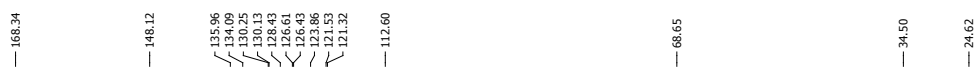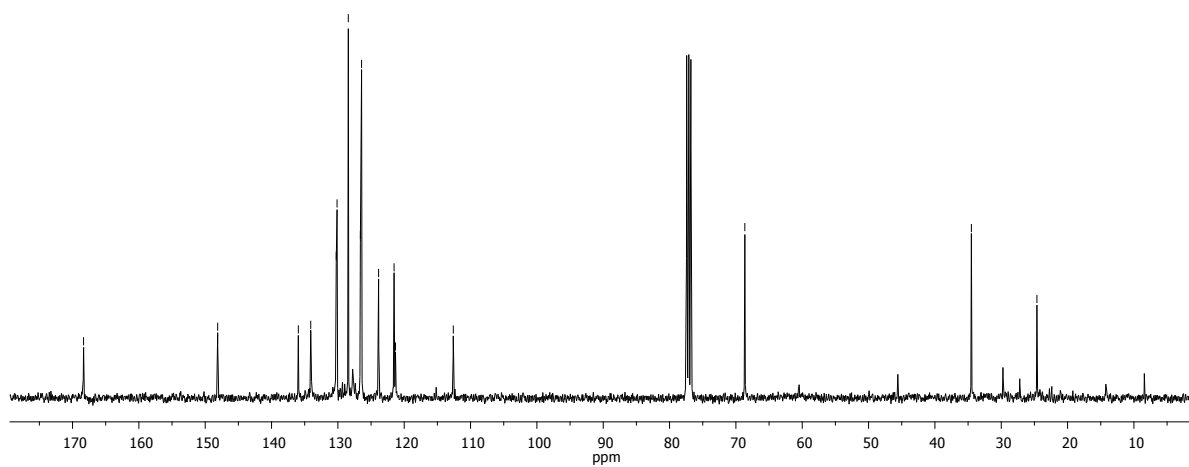

$^1\text{H}$  NMR and  $^{13}\text{C}$  NMR of 6d



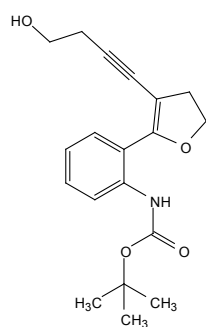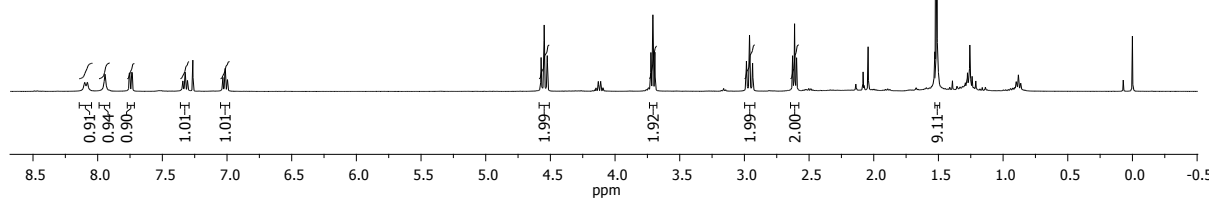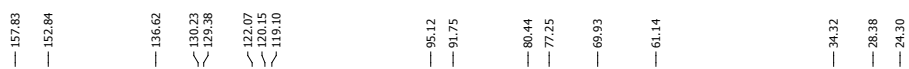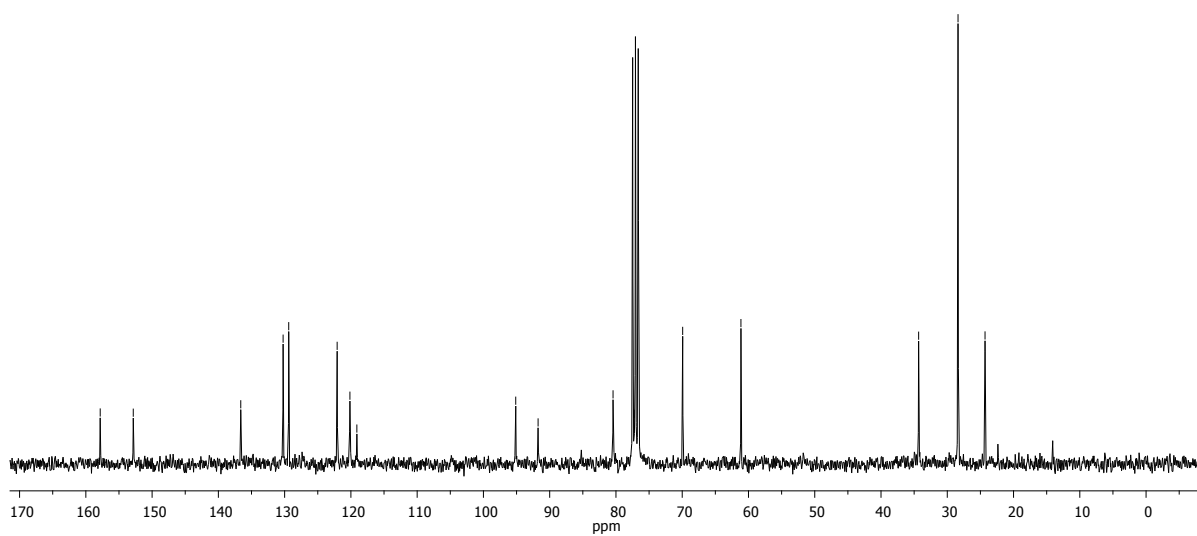

$^1\text{H}$  NMR and  $^{13}\text{C}$  NMR of 7b

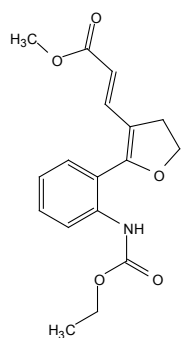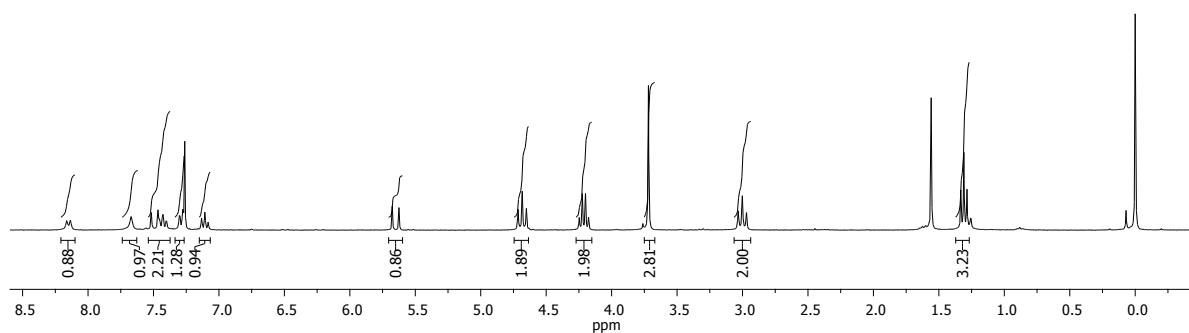

— 167.76  
 — 159.32  
 — 153.44  
 < 137.86  
 < 137.02  
 < 131.07  
 < 130.77  
 < 122.94  
 < 120.24  
 < 118.52  
 < 115.20  
 < 112.91  
 — 70.58  
 — 61.34  
 — 51.46  
 — 30.11  
 — 14.59

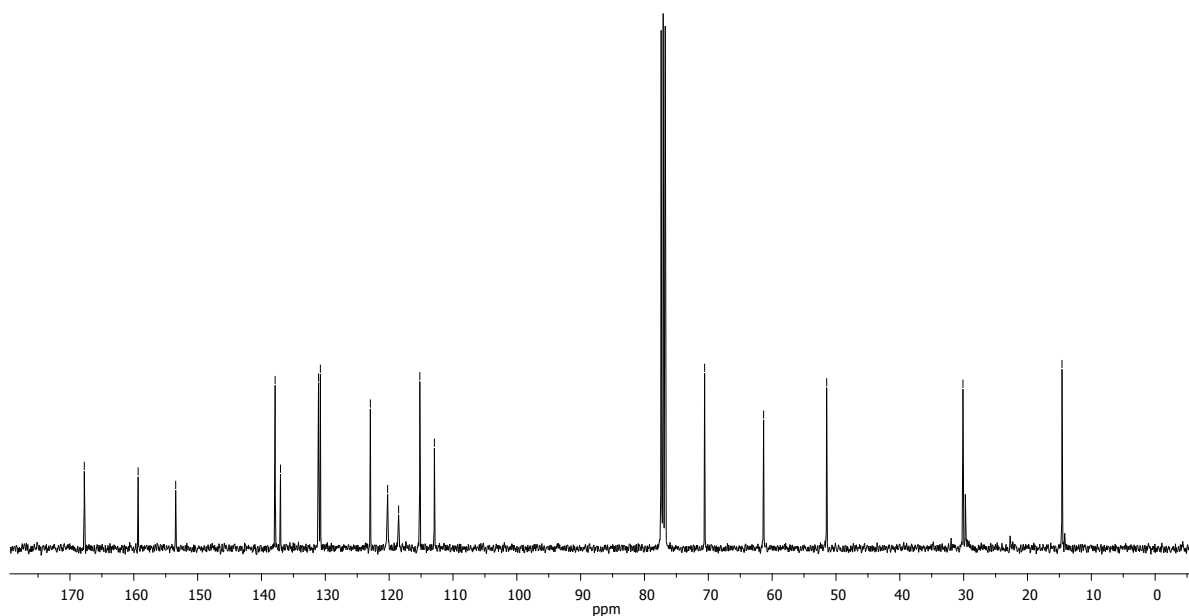

**<sup>1</sup>H NMR and <sup>13</sup>C NMR of 8a**

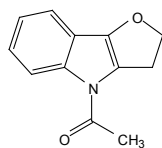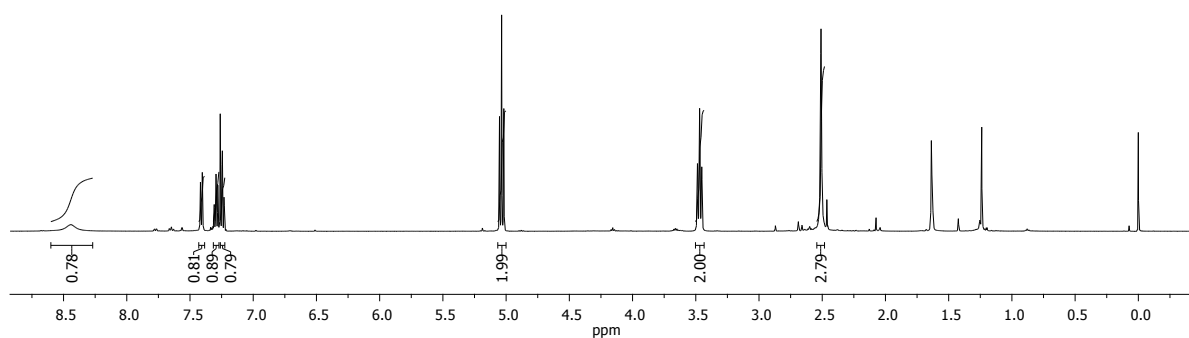

168.16, 149.07, 138.99, 131.19, 124.97, 124.82, 123.70, 118.42, 116.81, 60.42, 30.70, 24.62

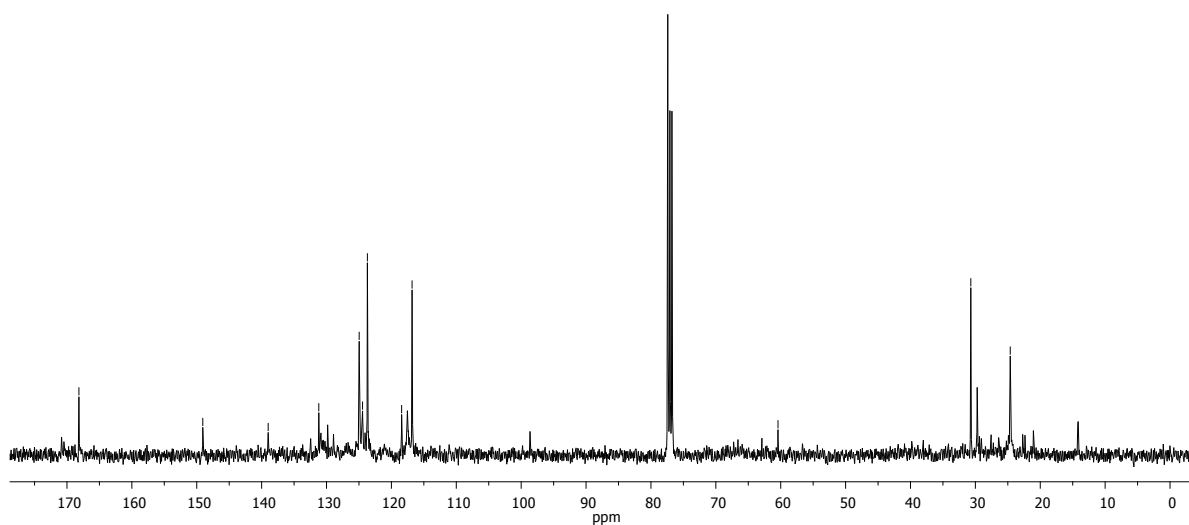

**<sup>1</sup>H NMR and <sup>13</sup>C NMR of 9d**

## X-ray Crystallographic Study:

### Compound 5e:

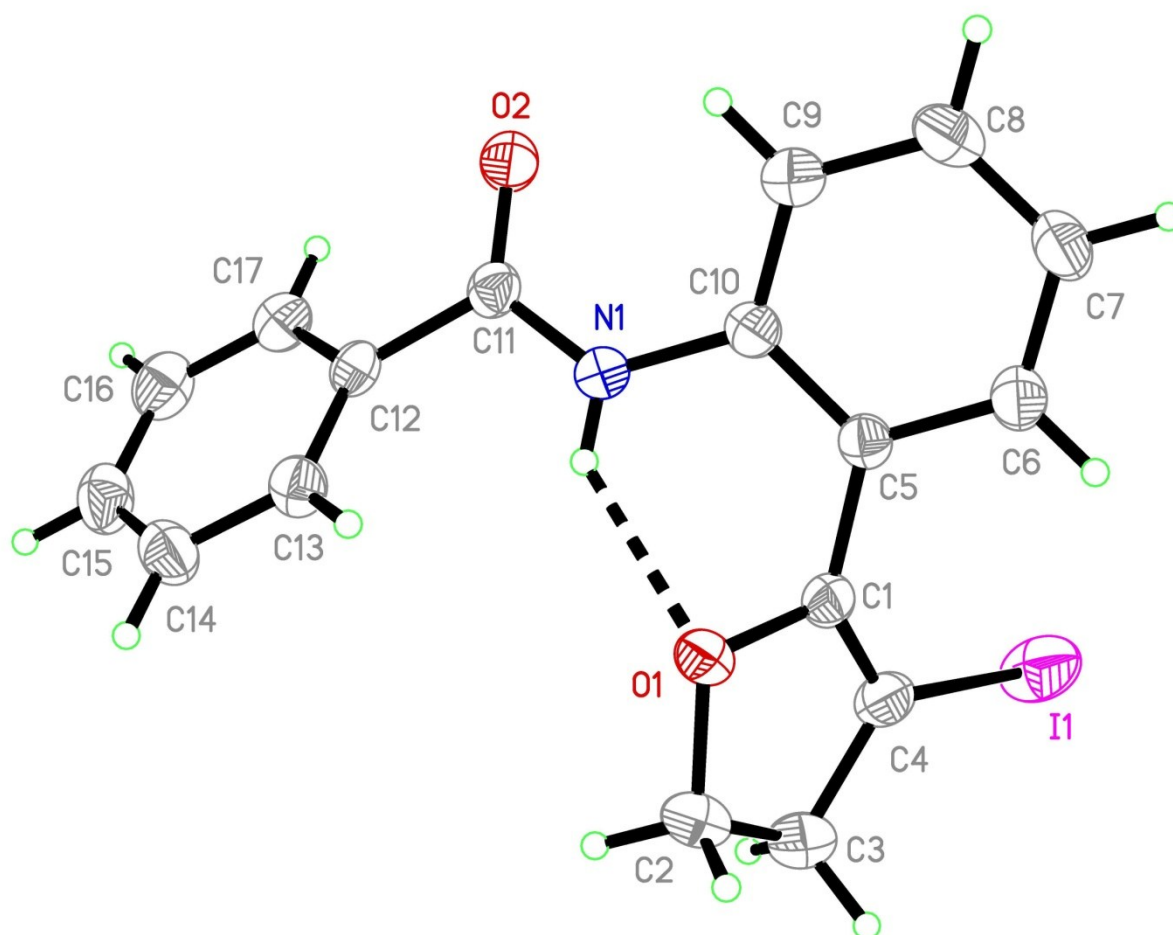

The molecular structure of **5e**, with the atom-numbering scheme. Displacement ellipsoids are drawn at the 30% probability level. Dashed lines indicate a hydrogen bond.

X-ray data of compound **5e** was collected at room temperature using a Bruker Smart Apex CCD diffractometer with graphite monochromated MoK $\alpha$  radiation ( $\lambda=0.71073\text{\AA}$ ) with  $\omega$ -scan method.<sup>1</sup> Preliminary lattice parameters and orientation matrices were obtained from four sets of frames.

Integration and scaling of intensity data were accomplished using SAINT program.<sup>1</sup> The structures were solved by Direct Methods using SHELXS<sup>2</sup> and refinement was carried out by full-matrix least-squares technique using SHELXL.<sup>2</sup> Anisotropic displacement parameters were included for all non-hydrogen atoms. The hydrogen atom attached to nitrogen atom was located in a difference density map and refined isotropically. All other H atoms were

positioned geometrically and treated as riding on their parent C atoms [C-H = 0.93-0.97 Å and  $U_{\text{iso}}(\text{H}) = 1.5U_{\text{eq}}(\text{C})$  for methyl H or  $1.2U_{\text{eq}}(\text{C})$  for other H atoms]. The methyl groups were allowed to rotate but not to tip.

**Crystal Data for 5e:**  $\text{C}_{17}\text{H}_{14}\text{INO}_2$  ( $M = 391.19$ ): orthorhombic, space group  $\text{Pbca}$  (no. 61),  $a = 13.7811(12)$  Å,  $b = 13.3475(11)$  Å,  $c = 16.9711(15)$  Å,  $V = 3121.7(5)$  Å<sup>3</sup>,  $Z = 8$ ,  $T = 294(2)$  K,  $\mu(\text{MoK}\alpha) = 2.055$  mm<sup>-1</sup>,  $D_{\text{calc}} = 1.665$  g/mm<sup>3</sup>, 33971 reflections measured ( $4.8 \leq 2\theta \leq 56.7$ ), 3837 unique ( $R_{\text{int}} = 0.0346$ ) which were used in all calculations. The final  $R_1$  was 0.0462 ( $>2\sigma(I)$ ) and  $wR_2$  was 0.1179 (all data). CCDC 1405059 contains supplementary Crystallographic data for the structure. These data can be obtained free of charge at [www.ccdc.cam.ac.uk/conts/retrieving.html](http://www.ccdc.cam.ac.uk/conts/retrieving.html) [or from the Cambridge Crystallographic Data Centre (CCDC), 12 Union Road, Cambridge CB2 1EZ, UK; fax: +44(0) 1223 336 033; email: [deposit@ccdc.cam.ac.uk](mailto:deposit@ccdc.cam.ac.uk)].

#### Compound 8a:

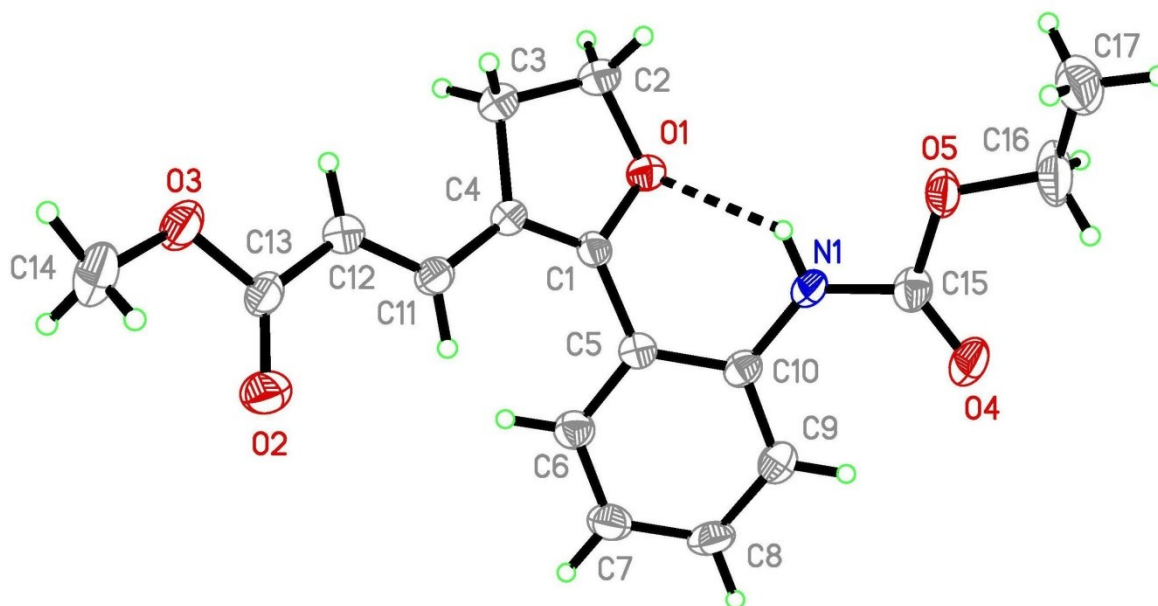

The molecular structure of **8a**, with the atom-numbering scheme. Displacement ellipsoids are drawn at the 30% probability level. Dashes line indicate a hydrogen bond.

X-ray data of compound **8a** was collected at room temperature using a Bruker Smart Apex CCD diffractometer with graphite monochromated  $\text{MoK}\alpha$  radiation ( $\lambda = 0.71073$  Å) with  $\omega$ -

scan method.<sup>1</sup> Preliminary lattice parameters and orientation matrices were obtained from four sets of frames.

Integration and scaling of intensity data were accomplished using SAINT program.<sup>1</sup> The structures were solved by Direct Methods using SHELXS<sup>2</sup> and refinement was carried out by full-matrix least-squares technique using SHELXL.<sup>2</sup> Anisotropic displacement parameters were included for all non-hydrogen atoms. The hydrogen atom attached to nitrogen atom was located in a difference density map and refined isotropically. All other H atoms were positioned geometrically and treated as riding on their parent C atoms [C-H = 0.93-0.97 Å and  $U_{\text{iso}}(\text{H}) = 1.5U_{\text{eq}}(\text{C})$  for methyl H or  $1.2U_{\text{eq}}(\text{c})$  for other H atoms]. The methyl groups were allowed to rotate but not to tip.

Crystal data for **8a**:  $\text{C}_{17}\text{H}_{19}\text{NO}_5$ ,  $M = 317.33$ ,  $0.18 \times 0.16 \times 0.09 \text{ mm}^3$ , monoclinic, space group  $P2_1/n$  (No. 14),  $a = 13.6571(12)$ ,  $b = 7.7611(7)$ ,  $c = 14.9680(14) \text{ \AA}$ ,  $\beta = 91.630(2)^\circ$ ,  $V = 1585.9(2) \text{ \AA}^3$ ,  $Z = 4$ ,  $D_c = 1.329 \text{ g/cm}^3$ ,  $F_{000} = 672$ , MoK $\alpha$  radiation,  $\lambda = 0.71073 \text{ \AA}$ ,  $T = 294(2)\text{K}$ ,  $2\theta_{\text{max}} = 50.0^\circ$ , 14739 reflections collected, 2794 unique ( $R_{\text{int}} = 0.0706$ ). Final  $GooF = 1.242$ ,  $RI = 0.0975$ ,  $wR2 = 0.1684$ ,  $R$  indices based on 2100 reflections with  $I > 2\sigma(I)$  (refinement on  $F^2$ ), 214 parameters, 0 restraints.  $\mu = 0.098 \text{ mm}^{-1}$ . CCDC 1051824 contains supplementary Crystallographic data for the structure. These data can be obtained free of charge at [www.ccdc.cam.ac.uk/conts/retrieving.html](http://www.ccdc.cam.ac.uk/conts/retrieving.html) [or from the Cambridge Crystallographic Data Centre (CCDC), 12 Union Road, Cambridge CB2 1EZ, UK; fax: +44(0) 1223 336 033; email: [deposit@ccdc.cam.ac.uk](mailto:deposit@ccdc.cam.ac.uk)].

#### Reference:

1. SMART & SAINT. Software Reference manuals. Versions 6.28a & 5.625, Bruker Analytical X-ray Systems Inc., Madison, Wisconsin, U.S.A., 2001.
2. Sheldrick, G. M. (2015). Acta Cryst. C71, 3–8.
